# Supplementary material for: Multivalent polyglycerol supported imidazolidin-4-one organocatalysts for enantioselective Friedel–Crafts alkylations
Source: publisher site journal article supplement (doi:10.3762/bjoc.11.83), 2015-05-12
Supplement: Additional file 1 [file 1860-5397-11-83-S1.pdf]

**Supporting Information**  
**for**  
**Multivalent polyglycerol supported imidazolidin-4-one**  
**organocatalysts for enantioselective Friedel–Crafts**  
**alkylations**

Tommaso Pecchioli, Manoj Kumar Muthyala, Rainer Haag\* and Mathias  
Christmann\*

Address: <sup>1</sup>Institut für Chemie und Biochemie, Freie Universität Berlin, Takustraße 3,  
14195 Berlin, Germany

Email: Rainer Haag - haag@chemie.fu-berlin.de; Mathias Christmann -  
mathias.christmann@fu-berlin.de

\*Corresponding author

**Experimental procedures, analytical data, copies of NMR spectra  
and GC reports**

**Contents**

|                                                                |            |
|----------------------------------------------------------------|------------|
| <b>1. General methods</b>                                      | <b>S2</b>  |
| <b>2. Experimental procedures</b>                              | <b>S3</b>  |
| <b>3. General procedure for the Friedel–Crafts alkylations</b> | <b>S15</b> |
| <b>4. Friedel–Crafts alkylation products</b>                   | <b>S16</b> |
| <b>5. Spectra of compounds</b>                                 | <b>S21</b> |
| <b>6. GC reports</b>                                           | <b>S38</b> |
| <b>7. References</b>                                           | <b>S44</b> |

## 1. General methods

Commercial reagents were used as received. All reactions were carried out under magnetic stirring and were monitored by TLC analysis on 0.20 mm silica gel plates (Macherey-Nagel G/UV<sub>254</sub>). Column chromatography was carried out on silica gel 60 M (0.04–0.063 mm) Macherey-Nagel. Dialysis was performed in benzoylated cellulose tubes from Sigma-Aldrich (D7884-10FT, width: 32 mm, molecular weight cut-off (MWCO) 2000 g·mol<sup>-1</sup>). Yields refer to spectroscopically and analytically pure compounds unless otherwise stated. <sup>1</sup>H NMR and <sup>13</sup>C NMR spectra were recorded on Bruker (ECP 400, AC 500, AV 700) or JEOL (ECX 400, Eclipse 500) instruments. Chemical shifts are reported relative to CDCl<sub>3</sub> (<sup>1</sup>H:  $\delta$  = 7.24 ppm; <sup>13</sup>C:  $\delta$  = 77.23 ppm), DMSO-*d*<sub>6</sub> (<sup>1</sup>H:  $\delta$  = 2.50 ppm; <sup>13</sup>C:  $\delta$  = 39.51 ppm) or acetone-*d*<sub>6</sub> (<sup>1</sup>H:  $\delta$  = 2.05 ppm; <sup>13</sup>C:  $\delta$  = 29.92 ppm). Integrals are in accordance with assignments, coupling constants are given in Hz. For detailed peak assignments 2D spectra were recorded where necessary (COSY, DEPT, HSQC, HMQC, HMBC and NOESY). IR spectra were recorded on a Perkin–Elmer Spectrum BX FTIR System spectrophotometer JASCO FT/IR–4100. HRMS analyses were performed on a Varian Inc. Ionspec QFT-7 (ESI-TOF, 4  $\mu$ L/min, 1.0 bar, 4 kV). Optical rotation measurements were performed on a P-2000 polarimeter from Jasco in a 1 dm optical-path length cell with the frequency of the Na<sub>D</sub> line measured at the temperature and concentration (in g/100 mL) indicated. The enantiomeric excess was determined by chiral GC: Agilent 6850 Series II GC System equipped with Hydrodex- $\beta$ -TBDAC column or Agilent 7890B equipped with Lipodex E column, the standards were prepared using racemic 5-benzyl-2,2,3-trimethylimidazolidin-4-one as catalyst.

## 2. Experimental procedures

### General procedure for the synthesis of compound **10**<sup>1</sup>

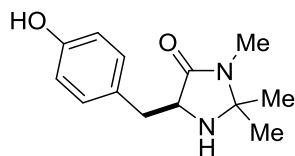

**(S)-5-(4'-Hydroxybenzyl)-2,2,3-trimethylimidazolidin-4-one (10).** To an ethanolic solution of MeNH<sub>2</sub> (8.0 M in EtOH; 69 mL, 550 mmol, 5.0 equiv) (S)-tyrosine methyl ester hydrochloride (**9**, 25.5 g, 110 mmol, 1.0 equiv) was added and the solution was stirred for 20 h at 25 °C. After completion of the reaction the organic solvents were removed under reduced pressure, the residue was re-suspended in THF and again concentrated. To remove excess MeNH<sub>2</sub> the THF addition–removal cycle was repeated several times. The white solid thus obtained was used in the next step without further purification. The crude product and *p*-toluenesulfonic acid (209 mg, 1.10 mmol, 0.01 equiv) were dissolved in mixture of anhyd. MeOH (200 mL) and anhyd. acetone (40 mL) and the mixture was refluxed for 18 h. After completion, the reaction mixture was cooled to room temp., all solvents were removed under reduced pressure, and the so-obtained residue was purified by column chromatography on silica gel (CH<sub>2</sub>Cl<sub>2</sub>/MeOH 20:1) to yield **10** (20.4 g, 79%). <sup>1</sup>H-NMR (CDCl<sub>3</sub>, 700 MHz):  $\delta$  = 6.99 (d, *J* = 8.5 Hz, 2H; Ar-H), 6.72 (d, *J* = 8.5 Hz, 2H; Ar-H), 3.75 (t, *J* = 5.3 Hz, 1H; CH), 2.98 (d, *J* = 5.4 Hz, 2H; Bn-H), 2.72 (s, 3H; N-Me), 1.25 (s, 3H; Me), 1.14 ppm (s, 3H; Me); <sup>13</sup>C-NMR (CDCl<sub>3</sub>, 175 MHz):  $\delta$  = 173.9, 155.9, 130.7, 127.3, 115.9, 76.1, 59.4, 35.8, 27.1, 25.5, 25.1 ppm.

## Synthesis of compound 5<sup>1</sup>

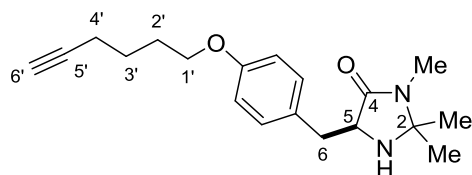

**(S)-5-(p-(Hex-5'-yn-1'-yloxy)benzyl)-2,2,3-trimethylimidazolidin-4-one (5).** NaH (60% in mineral oil; 282 mg, 7.02 mmol, 1.1 equiv) was added to solution of **10** (1.50 g, 6.40 mmol, 1 equiv) in anhyd. DMF (5 mL) at 0 °C. After 30 min of stirring at 0 °C, TBAI (23.0 mg, 0.06 mmol, 0.01 equiv) and 6-chloro-1-hexyne (1.01 mL, 8.32 mmol, 1.3 equiv) were added to the reaction and the mixture was allowed to warm to 25 °C and stirred for an additional 16 h. After this time, MeOH (1 mL) and H<sub>2</sub>O (5 mL) were added and the mixture was extracted with CH<sub>2</sub>Cl<sub>2</sub> (3 × 20 mL). The combined organic layers were dried over anhyd. Na<sub>2</sub>SO<sub>4</sub>, filtered, and concentrated under reduced pressure. The residue was purified by column chromatography on silica gel (pentane/EtOH/EtOAc 10:2:1) to yield **5** (1.78 g, 88%) as white solid. m.p.: 45–47 °C;  $R_f$  = 0.14 (pentane/EtOH/EtOAc 10:2:1);  $[\alpha]_D^{24}$  = –69.7 ( $c$  = 0.94 in CHCl<sub>3</sub>); <sup>1</sup>H-NMR (CDCl<sub>3</sub>, 700 MHz):  $\delta$  = 7.10 (d,  $J$  = 8.7 Hz, 2H; Ar-H), 6.79 (d,  $J$  = 8.7 Hz, 2H; Ar-H), 3.93 (t,  $J$  = 6.3 Hz, 2H; H-1'), 3.72 (dd,  $J$  = 5.9, 5.0 Hz, 1H; H-5), 3.04–2.96 (AB system,  $J$  = 14.4, 6.3 Hz, 2H; Bn-H), 2.72 (s, 3H; N-Me), 2.24 (td,  $J$  = 7.1, 2.7 Hz, 2H; H-4'), 1.95 (t,  $J$  = 2.7 Hz, 1H; H-6'), 1.89–1.85 (m, 2H; H-2'), 1.71–1.66 (m, 2H; H-3'), 1.24 (s, 3H; Me), 1.14 ppm (s, 3H; Me); <sup>13</sup>C-NMR (CDCl<sub>3</sub>, 175 MHz):  $\delta$  = 173.4 (C-4), 157.9 (Ar-C), 130.5 (2Ar-CH), 128.8 (Ar-C), 114.6 (2Ar-CH), 84.1 ( $\underline{\text{C}}\equiv\text{CH}$ ), 75.5 (C-2), 68.7 ( $\text{C}\equiv\text{CH}$ ), 67.2 (C-1'), 59.3 (C-5), 36.1 (Bn-C), 28.3 (C-2'), 27.2 (N-Me), 25.2 (2xMe), 25.0 (C-3'), 18.1 ppm (C-4'); IR (CDCl<sub>3</sub>):  $\tilde{\nu}$  = 3304, 3286, 2974, 2943, 2871, 1688, 1612, 1580, 1511, 1474, 1428, 1398, 1368, 1244, 1178, 1148,

1054, 1032, 822  $\text{cm}^{-1}$ ; HRMS (ESI) :  $m/z$  : calcd for  $\text{C}_{19}\text{H}_{26}\text{N}_2\text{O}_2+\text{H}^+$ : 315.2067; found: 315.2075  $[\text{M}+\text{H}^+]$ .

### Synthesis of hPG-OH **1**<sup>2</sup>

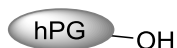

Hyperbranched polyglycerol (hPG) **1** with  $M_n = 9.000 \text{ g/mol}^{-1}$  (loading OH = 13.5 mmol/g, PDI = 1.87) was synthesized by a one-step ring opening anionic polymerization (ROAP) method, according to the earlier reported methods.<sup>2</sup> 1,1,1-Tris(hydroxymethyl)propane (TMP) was used as the starter in ROAP. Azide functionalized hPG were synthesized according to previously reported procedures.<sup>3-4</sup>

### Synthesis of hPG-OMs **2a-c**<sup>3,4</sup>

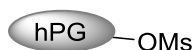

**General procedure:** Mesylation of hyperbranched polyglycerol **1** was carried out under an inert gas atmosphere and exclusion of moisture. In a two-necked 1 L flask, hyperbranched polyglycerol **1** (13.51 mmol OH-groups) was dissolved in anhyd. pyridine (60 mL). The resulting solution was stirred at 25 °C for 10 min and then cooled to 0 °C in an ice bath. A solution of methanesulfonyl chloride (1.2 equiv, with respect to functionalization degree) in anhyd. pyridine (20 mL) was added dropwise to the reaction mixture and stirring at 25 °C was continued for 16 h. The reaction mixture was then filtered and the solvent was removed under reduced pressure.

The degrees of functionalization were confirmed by  $^1\text{H}$  NMR of the crude products correlating the  $\text{CH}_3\text{-Ms}$  with polyglycerol backbone protons.

### hPG-OMs (>95%), **2a**

Reaction conditions were as described above, using **1** (1.0 g). The crude product was washed with cold H<sub>2</sub>O (3 × 10 mL), further dissolved and dialyzed in acetone for 72 h to give pure **2a** (1.52 g, 76% yield). <sup>1</sup>H-NMR (DMSO-*d*<sub>6</sub>, 400 MHz):  $\delta$  = 5.09–4.86 (functionalized secondary PG-groups), 4.58–4.35 (functionalized primary PG-groups), 4.05–3.45 (PG backbone), 3.27–3.11 (br s; Ms), 1.49–1.39 (m; CCH<sub>2</sub>CH<sub>3</sub> of starter), 0.91 ppm (t; CCH<sub>2</sub>CH<sub>3</sub>, of starter).

### hPG-OMs (57%), **2b**

Reaction conditions were as described above, using **1** (1.0 g). The crude product was dissolved in an acetone/H<sub>2</sub>O mixture (1:1 v/v) and dialyzed in the same mixture for 72 h to give pure **2b** (1.31, 82% yield). <sup>1</sup>H-NMR (acetone-*d*<sub>6</sub>, 400 MHz):  $\delta$  = 5.08–4.85 (functionalized secondary PG-groups), 4.42–4.17 (functionalized primary PG-groups), 4.05–3.75 (PG backbone), 3.25–3.12 (br s; Ms), 1.42–1.34 (m; CCH<sub>2</sub>CH<sub>3</sub> of starter), 0.87 ppm (t; CCH<sub>2</sub>CH<sub>3</sub>, of starter).

### hPG-OMs (30%), **2c**

Reaction conditions were as described above, using **1** (1.0 g). The crude product was dissolved in a MeOH/H<sub>2</sub>O mixture (1:1 v/v) and dialyzed in the same mixture for 72 h to give pure **2c** (1.12, 87% yield). <sup>1</sup>H-NMR (DMSO-*d*<sub>6</sub>, 400 MHz):  $\delta$  = 5.11–4.81 (functionalized secondary PG-groups), 4.30–4.21 (functionalized primary PG-groups), 4.15–3.45 (PG backbone), 3.27 (br s; Ms), 1.43–1.31 (m, CCH<sub>2</sub>CH<sub>3</sub> of starter), 0.90 ppm (t, CCH<sub>2</sub>CH<sub>3</sub>, of starter).

## Synthesis of hPG-N<sub>3</sub> **3a–c**<sup>3,4</sup>

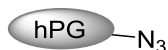

**General procedure:** To a homogeneous mixture of O-mesylpolyglycerol **2a–c** (1 equiv) in DMF (15 mL), NaN<sub>3</sub> (3 equiv) was added and the resulting suspension was heated at 65 °C for 72 h. After completion of the reaction, the mixture was cooled to room temp. and filtered through Celite<sup>®</sup> to remove excess NaN<sub>3</sub>. The filtrate was concentrated under reduced pressure at a temperature below 40 °C and handled with a plastic spatula to avoid a potentially explosive degradation of the polyazide.

### hPG-N<sub>3</sub> (95%), **3a**

Reaction conditions were as described above, using **2a** (1.52 g). The crude product was dissolved in CHCl<sub>3</sub> and extracted four times with H<sub>2</sub>O. The organic phase was dried over anhyd. MgSO<sub>4</sub>. To remove traces of DMF from the crude product an additional dialysis in a MeOH/CHCl<sub>3</sub> mixture (1:1 v/v) was performed to give pure **3a** (0.72 g, 72% yield). <sup>1</sup>H-NMR (CDCl<sub>3</sub>, 400 MHz):  $\delta$  = 4.04–3.35 (m; PG backbone), 1.45–1.33 (m; CCH<sub>2</sub>CH<sub>3</sub> of starter), 0.85 ppm (t; CCH<sub>2</sub>CH<sub>3</sub> of starter); <sup>13</sup>C-NMR (CDCl<sub>3</sub>, 400 MHz):  $\delta$  = 76.4–51.5 (PG backbone), 25.7 (CCH<sub>2</sub>CH<sub>3</sub> of starter), 8.8 ppm (CCH<sub>2</sub>CH<sub>3</sub> of starter); IR:  $\tilde{\nu}$  = 2871, 2091 (N<sub>3</sub>), 1447, 1345, 1267, 1174, 1099, 927 cm<sup>-1</sup>.

### hPG-N<sub>3</sub> (57%), **3b**

Reaction conditions were as described above, using **2b** (1.31 g). The crude product was dissolved in acetone/H<sub>2</sub>O mixture (1:1 v/v) and dialyzed in the same mixture for 72 h to give pure **3b** (0.78 g, 81% yield). <sup>1</sup>H-NMR (CDCl<sub>3</sub>, 400 MHz):  $\delta$  = 4.02–3.34 (m; PG backbone), 1.38–1.27 (m; CCH<sub>2</sub>CH<sub>3</sub> of starter), 0.79 (t; CCH<sub>2</sub>CH<sub>3</sub> of starter);

$^{13}\text{C}$ -NMR ( $\text{CDCl}_3$ , 100 MHz):  $\delta$  = 77.7–53.9 (PG backbone), 25.7 ( $\text{CCH}_2\text{CH}_3$  of starter), 8.0 ( $\text{CCH}_2\text{CH}_3$  of starter) ppm; IR:  $\tilde{\nu}$  = 3398, 2871, 2096 ( $\text{N}_3$ ), 1769, 1636, 1453, 1455, 1270, 1077, 991, 929  $\text{cm}^{-1}$ .

### hPG- $\text{N}_3$ (30%), **3c**

Reaction conditions were as described above, using **2c** (1.12 g). The residue was purified by dialysis in  $\text{H}_2\text{O}$  for 48 h to give pure **3c** (0.78 g, 86% yield).  $^1\text{H}$ -NMR ( $\text{DMSO}-d_6$ , 400 MHz):  $\delta$  = 4.05–3.35 (m; PG backbone), 1.35–1.29 (m;  $\text{CCH}_2\text{CH}_3$  of starter), 0.77 ppm (t;  $\text{CCH}_2\text{CH}_3$  of starter);  $^{13}\text{C}$ -NMR ( $\text{DMSO}-d_6$ , 100 MHz):  $\delta$  = 78.5–54.0 (PG backbone), 24.1 ( $\text{CCH}_2\text{CH}_3$  of starter), 10.4 ppm ( $\text{CCH}_2\text{CH}_3$  of starter); IR:  $\tilde{\nu}$  = 3382, 2871, 2359, 2341, 2098 ( $\text{N}_3$ ), 2035, 1771, 1635, 1558, 1455, 1272, 1078, 932, 869, 671  $\text{cm}^{-1}$ .

### Synthesis of hPG-cat. **4a–c**<sup>5</sup>

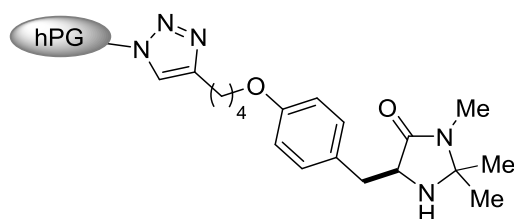

**General procedure:** hPG-azide **3a–c** (1.0 equiv) and alkyne **5** (2.0 equiv) were dissolved in a THF/ $\text{H}_2\text{O}$  mixture (3:1 v/v; 4 mL) and the resulting solution was degassed for 10 min. Sodium ascorbate (2.0 equiv) in  $\text{H}_2\text{O}$  (100 mg/mL) and  $\text{CuSO}_4 \cdot 5\text{H}_2\text{O}$  (0.2 equiv) in  $\text{H}_2\text{O}$  (100 mg/mL) were mixed and the resulting solution was added dropwise to the solution of hPG-azide **3a–c** and alkyne **5**. The reaction mixture was stirred at 25 °C for app. 48 h and the progress of the reaction was monitored by infrared (IR) spectroscopy. After completion of the



reaction, the mixture was diluted with  $\text{CHCl}_3$  and the resulting solution was washed with sat. aq. EDTA solution ( $2 \times 10 \text{ mL}$ ), followed by water ( $2 \times 10 \text{ mL}$ ), and dried over anhyd.  $\text{Na}_2\text{SO}_4$ . The compounds were further purified by dialysis MeOH/ $\text{CHCl}_3$  mixture (1:1 v/v) 24 h, and then MeOH and  $\text{CHCl}_3$ , respectively, for 12 h each.

The degrees of functionalization were confirmed by  $^1\text{H}$  NMR correlating the aromatic protons with polyglycerol backbone protons.

#### **hPG-Cat (95%), 4a**

Reaction conditions and purification methods were as described above, using **3a** (100 mg) to give pure **4a** (296 mg, 71% yield).  $^1\text{H}$ -NMR ( $\text{CDCl}_3$ , 700 MHz):  $\delta$  = 7.64–7.36 (m, 1H; triazole), 7.13–7.04 (m, 2H; Ar-H), 6.80–6.70 (m, 2H; Ar-H), 5.37–4.70 (functionalized secondary PG-groups), 4.67–4.38 (functionalized primary PG-groups), 4.31–3.15 (PG backbone), 3.92–3.84 (m, 2H;  $\text{CH}_2\text{O-Ar}$ ), 3.74–3.65 (br s, 1H;  $\text{HNCHCON}[\text{CH}_3]$ ), 3.07–2.98 (m, 1H; Bn-H), 2.97–2.88 (m, 1H; Bn-H), 2.76–2.63 (m, 5H; N- $\text{CH}_3$ , triazole- $\text{CH}_2$ -), 1.84–1.62 (m, 4H;  $[\text{CH}_2]_2$ -), 1.25 (s, 3H; Me), 1.17 ppm (s, 3H; Me);  $^{13}\text{C}$ -NMR ( $\text{CDCl}_3$ , 175 MHz):  $\delta$  = 173.5 (C=O), 157.8 (C-Ar), 147.7 (C<sub>5</sub>-triazole), 130.5 (C-Ar), 129.1 (C-Ar), 122.0 (C-Ar), 114.5 (C-Ar), 75.6 ( $\text{NC}[\text{CH}_3]_2\text{N}$ ), 72.9–68.6 (PG backbone), 67.4 ( $\text{CH}_2\text{O-Ar}$ ), 59.4, 36.2, 29.0–28.7, 27.3, 26.1–25.9, 25.2 (2xMe), 24.3 ppm; IR:  $\tilde{\nu}$  = 2929, 1682 ( $\text{CONHCH}_3$ ), 1611, 1510, 1429, 1399, 1243, 1177, 1112, 811, 752  $\text{cm}^{-1}$ .

### hPG-Cat (57%), 4b

Reaction conditions and purification methods were as described above, using **3b** (100 mg) to give pure **4b** (121 mg, 40% yield). <sup>1</sup>H-NMR (CDCl<sub>3</sub>, 700 MHz):  $\delta$  = 7.57–7.40 (m, 1H; triazole), 7.09–7.07 (m, 2H; Ar-H), 6.75 (m, 2H; Ar-H), 5.18–4.68 (functionalized secondary PG-groups), 4.49–4.24 (functionalized primary PG-groups), 4.20–3.25 (PG backbone), 3.90–3.82 (m, 2H; CH<sub>2</sub>OAr), 3.74–3.65 (br s, 1H; NHCHCON[CH<sub>3</sub>]), 3.02–3.00 (m, 1H; Bn-H), 2.94–2.88 (m, 1H; Bn-H), 2.71–2.62 (m, 5H; N-CH<sub>3</sub>, triazol-CH<sub>2</sub>-), 1.76–1.67 (m, 4H; [CH<sub>2</sub>]<sub>2</sub>), 1.22 (s, 3H; Me), 1.14 ppm (s, 3H; Me); <sup>13</sup>C NMR (CDCl<sub>3</sub>, 175 MHz):  $\delta$  = 173.5 (C=O), 157.9 (C-Ar), 147.6 (C<sub>5</sub>-triazole), 130.6 (C-Ar), 129.1–128.9 (C-Ar), 122.8–122.6 (C<sub>4</sub>-triazole), 114.6 (C-Ar), 75.6 (NC[CH<sub>3</sub>])<sub>2</sub>N), 72.9–68.6 (PG backbone), 67.5 (CH<sub>2</sub>OAr), 59.3, 36.2, 28.8, 27.2, 25.9, 25.2 (2xMe), 24.2 ppm; IR:  $\tilde{\nu}$  = 3312, 2924, 1679 (CONHCH<sub>3</sub>), 1611, 1510, 1428, 1398, 1388, 1296, 1241, 1176, 1110, 807, 664 cm<sup>-1</sup>.

### hPG-Cat (30%), 4c

Reaction conditions and purification methods were as described above, using **3c** (100 mg) to give pure **4c** (64.0 mg, 35% yield). <sup>1</sup>H-NMR (CDCl<sub>3</sub>, 700 MHz):  $\delta$  = 7.61–7.41 (m, 1H; triazole), 7.14–7.08 (m, 2H; Ar-H), 6.81–6.72 (m, 2H; Ar-H), 5.00–4.60 (functionalized secondary PG-groups), 4.44–4.32 (functionalized primary PG-groups), 4.28–3.15 (PG backbone), 3.87–3.80 (m, 2H; CH<sub>2</sub>O-Ar), 3.03–3.01 (m, 1H; Bn-H), 3.76–3.67 (br s, 1H; NHCHCON[CH<sub>3</sub>]), 2.94–2.89 (m, 1H; Bn-H), 2.76–2.63 (m, 5H; N-Me, triazol-CH<sub>2</sub>-), 1.84–1.70 (m, 4H; [CH<sub>2</sub>]<sub>2</sub>), 1.27 (s, 3H; Me), 1.15 ppm (s, 3H; Me); <sup>13</sup>C-NMR (CDCl<sub>3</sub>, 175 MHz):  $\delta$  = 173.6 (C=O), 157.9 (C-Ar), 147.6 (C<sub>5</sub>-triazole), 130.6 (C-Ar), 129.0–128.9 (C-Ar), 122.9–122.6 (C<sub>4</sub>-Triazole), 114.6 (C-Ar),

75.6 ( $\text{NC}[\text{CH}_3]_2\text{N}$ ), 72.9–68.6 (PG backbone), 67.5 ( $\text{CH}_2\text{OAr}$ ), 59.3, 36.2, 28.8, 27.2, 25.9, 25.2 (2xMe), 24.2 ppm; IR:  $\tilde{\nu}$  = 3357, 2869, 1675 ( $\text{CONHCH}_3$ ), 1611, 1431, 1400, 1242, 1177, 1077, 808, 664  $\text{cm}^{-1}$ .

### Synthesis of compound 6

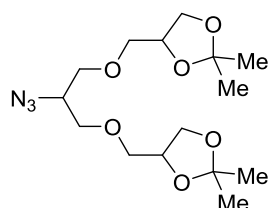

[G1]- $\text{N}_3$  was synthesized according to the earlier reported methods.<sup>6</sup>

### Synthesis of compound 7

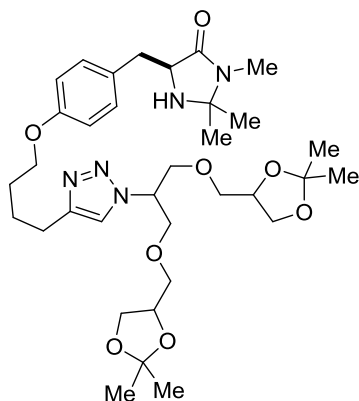

To a homogeneous solution of alkyne **5** (100 mg, 0.32 mmol, 1.0 equiv) and [G1]- $\text{N}_3$  **6** (120 mg, 0.35 mmol, 1.1 equiv) in a THF/ $\text{H}_2\text{O}$  mixture (3:1 v/v; 4 mL), DIPEA (4.00 mg, 0.032 mmol, 0.1 equiv) was added. Stock solutions (100 mg/mL in  $\text{H}_2\text{O}$ ) of sodium ascorbate (13.0 mg, 0.064 mmol, 0.2 equiv) and  $\text{CuSO}_4 \cdot 5\text{H}_2\text{O}$  (8.00 mg, 0.032 mmol, 0.1 equiv) were added simultaneously to the reaction mixture which was further stirred at 25 °C for 12 h. After completion of the reaction, the resulting residue was diluted with  $\text{H}_2\text{O}$  and

extracted with  $\text{CH}_2\text{Cl}_2$  ( $3 \times 10$  mL). The combined organic layers were washed consecutively with sat. aq EDTA solution ( $2 \times 10$  mL) and  $\text{H}_2\text{O}$  ( $3 \times 10$  mL), dried over anhyd.  $\text{Na}_2\text{SO}_4$ , and concentrated under reduced pressure. The resulting crude product was purified by column chromatography on silica gel ( $\text{CH}_2\text{Cl}_2/\text{MeOH}$  20:1) to give pure **7** as a mixture of diastereoisomers (150 mg, 70% yield).

$^1\text{H}$ -NMR ( $\text{CD}_3\text{OD}$ , 500 MHz):  $\delta$  = 7.88–7.79 (m, 1H; triazole), 7.17–7.12 (m, 2H; Ar-H), 6.86–6.82 (m, 2H; Ar-H), 4.96–4.93 (m, 1H), 4.21–4.13 (m, 2H), 4.12–4.02 (m, 1H), 3.98–3.88 (m, 7H), 3.74 (dd,  $J$  = 7.8, 4.1 Hz, 1H), 3.64–3.58 (m, 2H), 3.54–3.43 (m, 4H), 3.03 (dd,  $J$  = 14.3, 4.2 Hz, 1H; Bn-H), 2.85 (dd,  $J$  = 14.3, 7.3 Hz, 1H; Bn-H), 2.78 (d,  $J$  = 7.0 Hz, 2H; triazole- $\text{CH}_2$ ), 2.75 (s, 3H; N- $\text{CH}_3$ ), 1.88–1.75 (m, 4H;  $-\text{CH}_2-$ ), 1.36 (s, 3H;  $\text{OC}(\text{CH}_3)_2$ ), 1.31–1.29 (m, 6H;  $\text{OC}(\text{CH}_3)_2$ ), 1.23 (s, 3H; Me), 1.13 ppm (s, 3H; Me);  $^{13}\text{C}$ -NMR ( $\text{CD}_3\text{OD}$ , 125 MHz):  $\delta$  = 174.2, 158.2, 147.2, 130.2, 129.2, 121.9, 114.3, 109.2 (2C), 76.1, 74.7 (2C), 71.9, 71.6, 70.1, 70.0, 69.9, 67.3, 66.0, 59.6, 35.8, 28.5, 25.8, 25.7, 25.6, 24.7, 24.3 (2C), 24.2, 23.5 ppm; IR:  $\tilde{\nu}$  = 2982, 2932, 2870, 1685 ( $\text{CONHCH}_3$ ), 1611, 1581, 1550, 1510, 1473, 1455, 1427, 1397, 1380, 1369, 1241, 1177, 1145, 1111, 1078, 953, 838, 731  $\text{cm}^{-1}$ ; HRMS (ESI) calcd for  $\text{C}_{34}\text{H}_{45}\text{N}_5\text{O}_8 + \text{H}^+$ : 660.3967; found 660.3970  $[\text{M} + \text{H}]^+$ , 682.3748  $[\text{M} + \text{Na}]^+$ .

CN(C)C(=O)[C@H](Cc1ccc(OCC2CCN3C=CC=C2N3)cc1)NC(C)(C)OCC(O)COCC(O)CO

<sup>1</sup>H-NMR (CD<sub>3</sub>OD, 700 MHz):  $\delta$  = 7.93–7.81 (m, 1H; triazole), 7.19–7.14 (m, 2H; Ar-H), 6.87 (dd,  $J$  = 8.8, 2.6 Hz, 2H; Ar-H), 5.00–4.94 (m, 1H), 4.66–4.48 (m, 1H), 4.04–3.88 (m, 4H), 3.82–3.42 (m, 12H), 3.05 (dd,  $J$  = 14.4, 4.2 Hz, 1H; Bn-H), 2.88 (dd,  $J$  = 14.4, 7.2 Hz, 1H; Bn-H), 2.77 (m, 5H), 1.95–1.77 (m, 4H), 1.29 (s, 3H; Me), 1.23 ppm (s, 3H; Me); <sup>13</sup>C-NMR (CD<sub>3</sub>OD, 125 MHz):  $\delta$  = 174.1, 158.1, 158.1, 147.4, 147.2, 130.2, 130.2, 129.1, 123.4, 123.3, 121.9, 121.9, 121.9, 115.0, 114.3, 77.7 (2C), 77.6 (2C), 76.1, 72.6 (2C), 72.4, 72.3, 71.3 (2C), 71.0 (2C), 70.8 (2C), 70.7, 70.0 (2C), 69.9 (2C), 67.2 (2C), 62.9 (3C), 62.8 (2C), 60.9 (3C), 60.1, 59.5, 51.4, 50.7, 50.6, 35.8, 35.6, 31.4, 28.7, 28.5, 28.4 (2C), 25.7, 25.6, 24.7, 24.6 (2C), 24.2, 23.5, 22.3, 13.0 ppm; IR:  $\tilde{\nu}$  = 3339 (OH), 2928, 2870, 1736, 1657 (CO-NH-CH<sub>3</sub>), 1611, 1580, 1549, 1510, 1444, 1404, 1298, 1241, 1177, 1111, 1024, 953, 820, 659 cm<sup>-1</sup>; HRMS (ESI) calcd for C<sub>28</sub>H<sub>45</sub>N<sub>5</sub>O<sub>8</sub>+H<sup>+</sup>: 580.3341; found: 580.3404 [M+H]<sup>+</sup>, 602.318 [M+Na]<sup>+</sup>.

## General procedure for the synthesis of **16**<sup>7</sup>

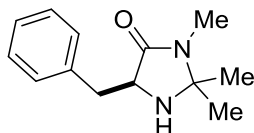

**5-Benzyl-2,2,3-trimethylimidazolidin-4-one (16).** Reaction conditions and work-up were as described above (Section 2 Supporting Information File 1, page S3), using (*S*)-phenylalanine methyl ester hydrochloride (1.08 g, 5.03 mmol, 1.0 equiv). The so-obtained crude product was purified by column chromatography on silica gel (EtOAc) to give pure **16** (790 mg, 72%).

<sup>1</sup>H-NMR (CDCl<sub>3</sub>, 500 MHz):  $\delta$  = 7.24–7.14 (m, 5H), 3.72 (dd,  $J$  = 6.8, 4.5 Hz, 1H), 3.07 (dd,  $J$  = 14.2, 4.5 Hz, 1H), 2.94 (dd,  $J$  = 14.2, 6.8 Hz, 1H), 2.68 (s, 1H), 1.19 (s, 3H), 1.09 ppm (s, 3H); <sup>13</sup>C-NMR (CDCl<sub>3</sub>, 125 MHz):  $\delta$  = 173.4, 137.2, 129.5, 128.6, 126.8, 75.5, 59.3, 37.4, 27.3, 25.4, 25.2 ppm.

## Synthesis of *trans*-*p*-methoxy-cinnamaldehyde (**14c**)<sup>8</sup>

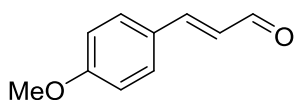

***trans*-*p*-Methoxy-cinnamaldehyde (14c).** KO<sup>*t*</sup>Bu (824 mg, 7.34 mmol, 2.0 equiv) was added to a suspension of (1,3-dioxan-2-ylmethyl)triphenylphosphonium bromide (3.47 g, 8.08 mmol, 2.2 equiv) in anhyd. THF (30 mL) at 0 °C and the mixture was stirred for 30 min at this temp. A solution of *p*-anisaldehyde (500 mg, 3.67 mmol, 1.0 equiv) in anhyd. THF (7 mL) was then slowly added, and the mixture was stirred for

1 h at 25 °C and then heated at reflux for an additional 24 h. Then, the reaction mixture was quenched by the addition of aq oxalic acid (8 g in 100 mL of H<sub>2</sub>O) and stirred at 25 °C for an additional 16 h. Afterwards, the mixture was extracted with Et<sub>2</sub>O (2 × 50 mL), the combined organic layers were washed consecutively with sat. aq NaHCO<sub>3</sub> (80 mL) and H<sub>2</sub>O (80 mL), dried over anhyd. Na<sub>2</sub>SO<sub>4</sub> and concentrated under reduced pressure. Purification of the residue by column chromatography on silica gel (pentane/EtOAc 7:1) afforded pure *trans*-*p*-methoxy-cinnamaldehyde (**14c**) as a yellow solid (595 mg, 83%).

<sup>1</sup>H-NMR (CDCl<sub>3</sub>, 400 MHz):  $\delta$  = 9.62 (d, *J* = 7.8 Hz, 1H), 7.50 (d, *J* = 8.6 Hz, 2H), 7.40 (d, *J* = 15.8 Hz, 1H), 6.92 (d, *J* = 8.8 Hz, 2H), 6.58 (dd, *J* = 15.8, 7.8 Hz, 1H), 3.83 ppm (s, 3H); <sup>13</sup>C-NMR (CDCl<sub>3</sub>, 175 MHz):  $\delta$  = 193.7, 162.2, 152.7, 130.4, 126.8, 126.5, 114.6, 55.5 ppm.

### 3. General procedure for the Friedel–Crafts alkylations

A solution of the catalyst **4a–c** or **8** or **16** (*x* mol %) in the **solvent** indicated was treated with aq TFA (5 M; *x* mol %). The mixture was stirred at room temp. for 10 minutes, then the aldehyde **12** or **14a–e** (0.25 mmol, 1.0 equiv) was added at the desired temperature **T**. After 5 minutes of stirring, *N*-methylpyrrole (**11**, 111  $\mu$ L, 1.25 mmol, 5.0 equiv) was added and the reaction was stirred at the same temperature **T**. Et<sub>2</sub>O (3 mL) was added to the mixture and the catalyst was removed by filtration, washed several time with Et<sub>2</sub>O, then recovered with CH<sub>2</sub>Cl<sub>2</sub> and dried in vacuo for future use. The organic phase was concentrated under reduced pressure and the so-obtained residue was purified by silica gel chromatography (pentane/Et<sub>2</sub>O) to afford the corresponding products.

#### 4. Friedel–Crafts alkylations products

##### Synthesis of compound 13

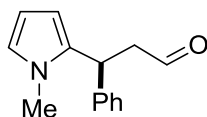

**(S)-3-(1-Methyl-1H-pyrrol-2-yl)-3-phenylpropanal (13).**<sup>9</sup> Reaction conditions and work-up were as described above, using commercially available *trans*-cinnamaldehyde (**12**, 31.5  $\mu$ L) and *N*-methylpyrrole (**11**). Purification by column chromatography on silica gel (pentane/Et<sub>2</sub>O 7:1) gave **13** (46.2 mg, 87%). <sup>1</sup>H-NMR (CDCl<sub>3</sub>, 400 MHz):  $\delta$  = 9.74 (t,  $J$  = 0.8 Hz, 1H), 7.30–7.13 (m, 5H), 6.55 (t,  $J$  = 2.0 Hz, 1H), 6.12–6.09 (m, 2H), 4.56 (t,  $J$  = 7.5 Hz, 1H), 3.31 (s, 3H), 3.15 (ddd,  $J$  = 17.2, 8.4, 2.0 Hz, 1H), 2.95 ppm (ddd,  $J$  = 17.2, 6.8, 1.6 Hz, 1H); <sup>13</sup>C-NMR (CDCl<sub>3</sub>, 175 MHz):  $\delta$  = 200.9, 142.5, 133.1, 128.8, 127.7, 126.8, 122.5, 106.7, 106.6, 50.1, 37.7, 33.9 ppm. The enantiomeric excess was determined by chiral GC on a Hydrodex- $\beta$ -TBDAC column (120 °C isotherm, 1.1 mL/min He): *S* isomer  $t_r$  = 185.45 min and *R* isomer  $t_r$  = 191.51 min. The absolute configuration was determined by reduction to the corresponding alcohol and comparison of the optical specific rotation with reported data.<sup>9</sup>

##### Synthesis of compound 15a

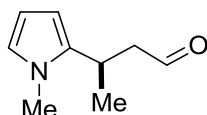

**(R)-3-(1-Methyl-1H-pyrrol-2-yl)butanal (15a).**<sup>9</sup> Reaction conditions and work-up were as described above, using commercially available predominantly *trans*-



crotonaldehyde (**14a**, 20.4  $\mu$ L) and *N*-methylpyrrole (**11**). Purification by column chromatography on silica gel (pentane/Et<sub>2</sub>O 9:1) gave **15a** (32.5 mg, 86%). <sup>1</sup>H-NMR (CDCl<sub>3</sub>, 400 MHz):  $\delta$  = 9.74 (t, *J* = 1.7 Hz, 1H), 6.53 (t, *J* = 2.2 Hz, 1H), 6.05 (t, *J* = 3.2 Hz, 1H), 5.88 (dd, *J* = 3.6, 2.0 Hz, 1H), 3.59 (s, 3H), 3.38 (q, *J* = 7.2 Hz, 1H), 2.79 (ddd, *J* = 17.2, 6.2, 1.5 Hz, 1H), 2.64 (ddd, *J* = 17.2, 7.9, 1.8 Hz, 1H), 1.27 ppm (d, *J* = 6.9 Hz, 3H); <sup>13</sup>C-NMR (CDCl<sub>3</sub>, 175 MHz):  $\delta$  = 201.7, 136.6, 121.6, 106.8, 104.2, 50.6, 33.6, 25.4, 21.4 ppm. The enantiomeric excess was determined by chiral GC on a Hydrodex- $\beta$ -TBDAC column (130 °C isotherm, 1.1 mL/min He): *S* isomer *t*<sub>r</sub> = 11.00 min and *R* isomer *t*<sub>r</sub> = 11.48 min. The absolute configuration was determined by reduction to the corresponding alcohol and comparison of the optical specific rotation with reported data.<sup>9</sup>

### Synthesis of compound 15b

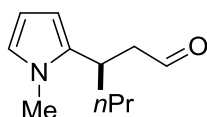

**(*R*)-3-(1-Methyl-1*H*-pyrrol-2-yl)hexanal (**15b**).**<sup>10</sup> Reaction conditions and work-up were as described above, using commercially available *trans*-2-hexenal (**14b**, 29.1  $\mu$ L) and *N*-methylpyrrole (**11**). Purification by column chromatography on silica gel (pentane/Et<sub>2</sub>O 8:1) gave **15b** (37.2 mg, 83%). <sup>1</sup>H-NMR (CDCl<sub>3</sub>, 400 MHz):  $\delta$  = 9.69 (t, *J* = 1.6 Hz, 1H), 6.50 (dd, *J* = 2.4, 1.6 Hz, 1H), 6.06 (t, *J* = 3.2 Hz, 1H), 5.87 (dd, *J* = 3.2, 1.6 Hz, 1H), 3.58 (s, 3H), 3.27 (q, *J* = 6.8 Hz, 1H), 2.73 (ddd, *J* = 17.2, 7.6, 1.6 Hz, 1H), 2.69 (ddd, *J* = 17.2, 6.8, 2.0 Hz, 1H), 1.61–1.55 (m, 2H), 1.30–1.22 (m, 2H), 0.87 ppm (t, *J* = 7.3 Hz, 3H); <sup>13</sup>C-NMR (CDCl<sub>3</sub>, 175 MHz):  $\delta$  = 202.1, 136.6, 121.2, 106.8, 104.8, 49.6, 38.6, 33.8, 30.5, 20.2, 14.0 ppm. The enantiomeric excess was

determined by chiral GC on a Hydrodex- $\beta$ -TBDAc column (90 °C isotherm, 1.1 mL/min He): *R* isomer  $t_r$  = 111.97 min and *S* isomer  $t_r$  = 114.95 min. The absolute configuration was determined by reduction to the corresponding alcohol and comparison of the optical specific rotation with reported data.<sup>10</sup>

### Synthesis of compound 15c

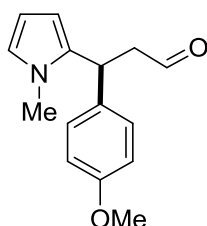

**(*S*)-3-(4-Methoxyphenyl)-3-(1-methyl-1*H*-pyrrol-2-yl)propanal (15c).**<sup>10</sup> Reaction conditions and work-up were as described above, using *trans*-*p*-methoxycinnamaldehyde (**14c**, 40.5 mg) and *N*-methylpyrrole (**11**). Purification by column chromatography on silica gel (pentane/Et<sub>2</sub>O 6:1) gave **15c** (48.6 mg, 80%). <sup>1</sup>H-NMR (CDCl<sub>3</sub>, 700 MHz):  $\delta$  = 9.76 (t,  $J$  = 1.8 Hz, 1H), 7.07 (d,  $J$  = 8.7 Hz, 2H), 6.83 (d,  $J$  = 8.7 Hz, 2H), 6.57 (t,  $J$  = 2.1 Hz, 1H), 6.12 (dd,  $J$  = 3.5, 2.8 Hz, 1H), 6.09–6.08 (m, 1H), 4.53 (t,  $J$  = 7.5 Hz, 1H), 3.79 (s, 3H), 3.33 (s, 3H), 3.14 (ddd,  $J$  = 17.1, 7.9, 2.1 Hz, 1H), 2.95 ppm (ddd,  $J$  = 17.1, 7.9, 2.1 Hz, 1H); <sup>13</sup>C-NMR (CDCl<sub>3</sub>, 175 MHz):  $\delta$  = 201.3, 158.3, 134.4, 133.5, 128.7, 122.5, 114.1, 106.5, 106.4, 55.3, 50.2, 36.8, 34.0 ppm. The enantiomeric excess was determined by chiral GC on a Lipodex E column (150 °C isotherm, 1.1 mL/min He): *R* isomer  $t_r$  = 116.11 min and *S* isomer  $t_r$  = 120.75 min.

## Synthesis of compound 15d

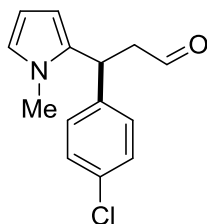

**(S)-3-(4-Chlorophenyl)-3-(1-methyl-1H-pyrrol-2-yl)propanal (15d).**<sup>10</sup> Reaction conditions and work-up were as described above, using commercially available *trans*-*p*-chloro-cinnamaldehyde (**14d**, 43.4 mg) and *N*-methylpyrrole (**11**). Purification by column chromatography on silica gel (pentane/Et<sub>2</sub>O 4:1) gave **15d** (53.4 mg, 86%). <sup>1</sup>H-NMR (CDCl<sub>3</sub>, 700 MHz):  $\delta$  = 9.73 (br t, 1H), 7.28–7.26 (m, 2H), 7.11–7.10 (m, 2H), 6.58 (br t, 1H), 6.13–6.10 (m, 2H), 4.57 (t, *J* = 7.5 Hz, 1H), 3.33 (s, 3H), 3.17 (ddd, *J* = 17.4, 7.9, 1.5 Hz, 1H), 2.95 ppm (ddd, *J* = 17.3, 7.1, 1.3 Hz, 1H); <sup>13</sup>C-NMR (CDCl<sub>3</sub>, 175 MHz):  $\delta$  = 200.3, 141.1, 132.7, 132.5, 129.1, 129.0, 122.7, 106.7, 50.0, 36.9, 33.8 ppm. The enantiomeric excess was determined by chiral GC on a Hydrodex- $\beta$ -TBDAc column (160 °C isotherm, 1.1 mL/min He): *S* isomer *t<sub>r</sub>* = 74.69 min and *R* isomer *t<sub>r</sub>* = 79.00 min. The absolute configuration was determined by comparison of the optical specific rotation of the aldehyde with reported data.<sup>1</sup>

## Synthesis of compound 15e

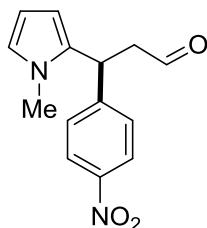

**(S)-3-(1-Methyl-1H-pyrrol-2-yl)-3-(4-nitrophenyl)propanal, (15e).**<sup>10</sup> Reaction conditions and work-up were as described above, using commercially available *trans*-*p*-nitro-cinnamaldehyde (**14e**, 44.3 mg) and *N*-methylpyrrole (**11**). Purification by column chromatography on silica gel (pentane/Et<sub>2</sub>O 5:1) gave **15e** (64.2 mg, 99%). <sup>1</sup>H-NMR (CDCl<sub>3</sub>, 400 MHz):  $\delta$  = 9.75 (br t, 1H), 8.13 (d,  $J$  = 8.7 Hz, 2H), 7.33 (d,  $J$  = 8.7 Hz, 2H), 6.57 (t,  $J$  = 2.2 Hz, 1H), 6.12 (d,  $J$  = 2.3 Hz, 2H), 4.69 (t,  $J$  = 7.3 Hz, 1H), 3.31 (s, 3H), 3.24 (ddd,  $J$  = 17.7, 7.5, 1.3 Hz, 1H), 3.01 ppm (ddd,  $J$  = 17.3, 6.9, 0.8 Hz, 1H); <sup>13</sup>C-NMR (CDCl<sub>3</sub>, 125 MHz):  $\delta$  = 199.6, 150.3, 146.9, 131.9, 128.9, 124.2, 123.1, 107.1, 48.8, 37.0, 34.0 ppm. The enantiomeric excess was determined by chiral GC on a Hydrodex- $\beta$ -TBDAc column (140 °C to 200 °C, gradient 1 °C/min, 1.1 mL/min He): *S* isomer  $t_r$  = 113.36 min and *R* isomer  $t_r$  = 116.67 min. The absolute configuration was determined by comparison of the optical specific rotation of the aldehyde with reported data.<sup>10</sup>

## 5. Spectra of compounds

### $^1\text{H}$ and $^{13}\text{C}$ -NMR of compound 5

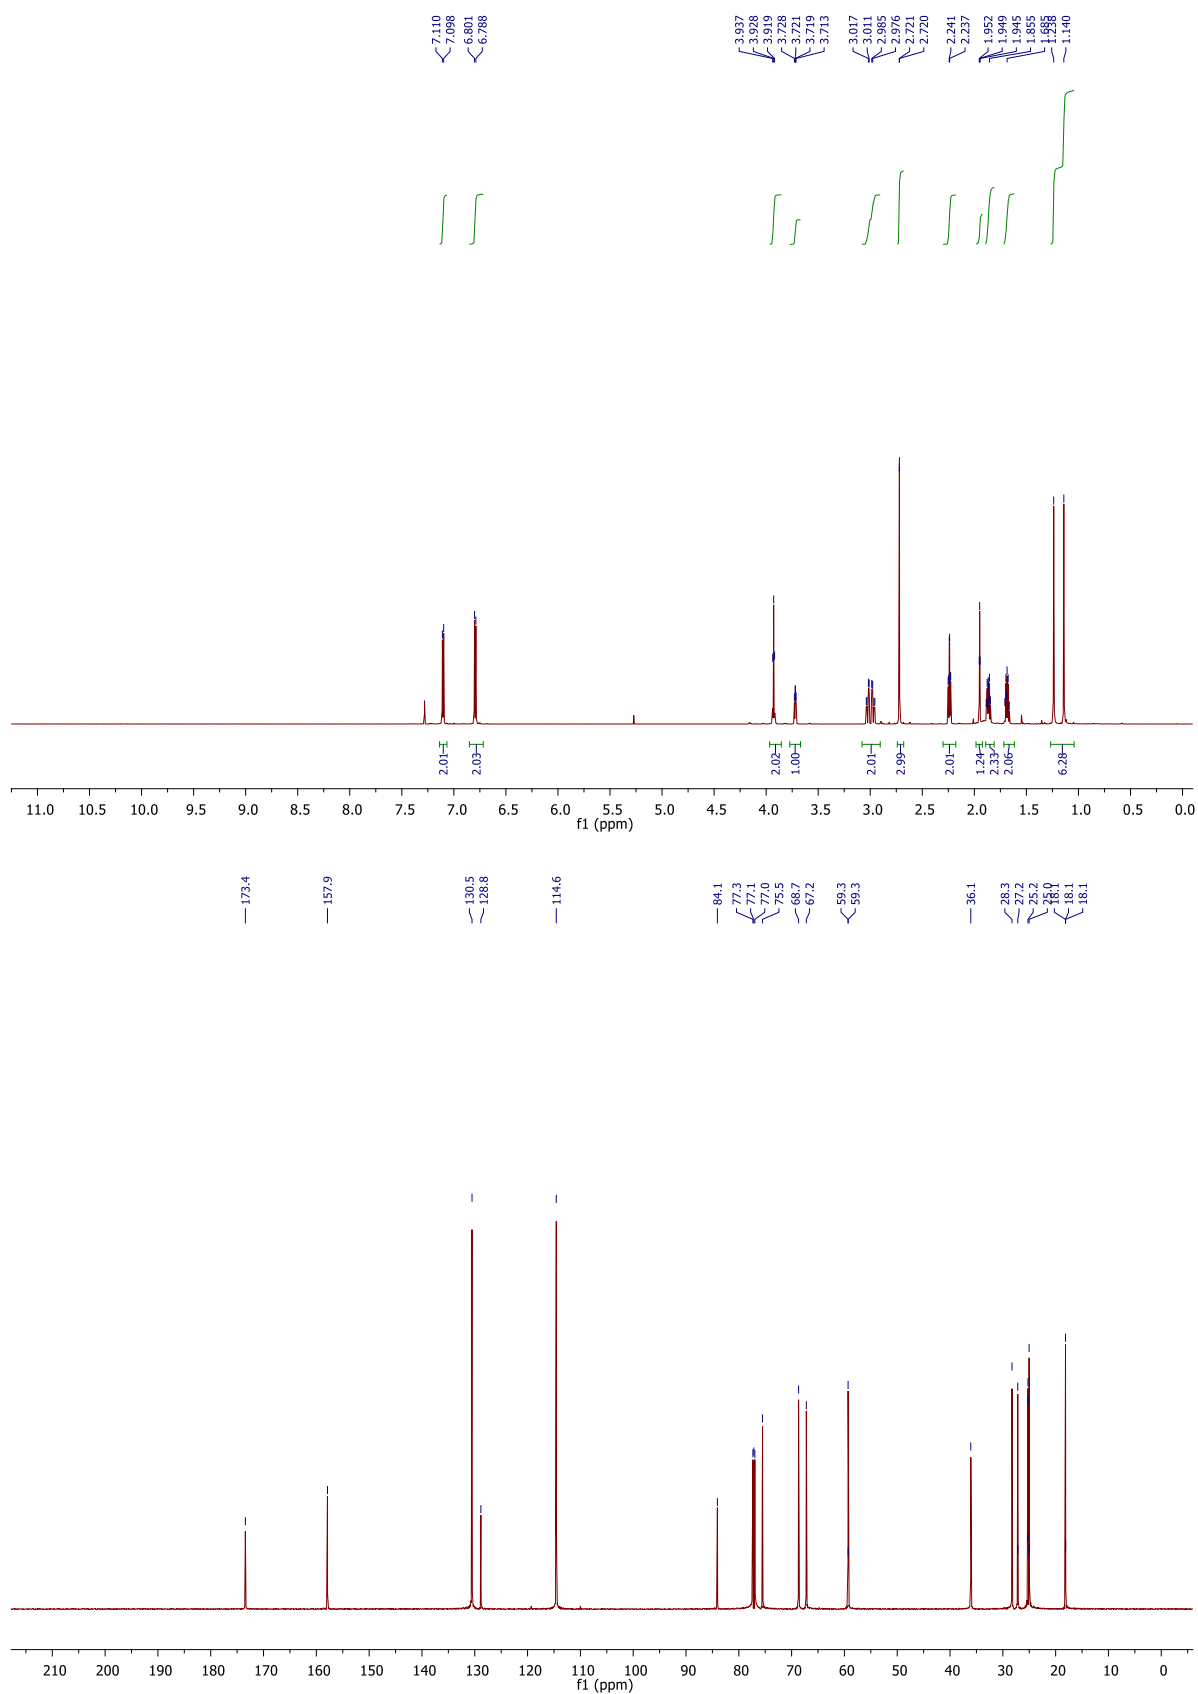

## Crude $^1\text{H}$ -NMR of hPG-OMs 2a

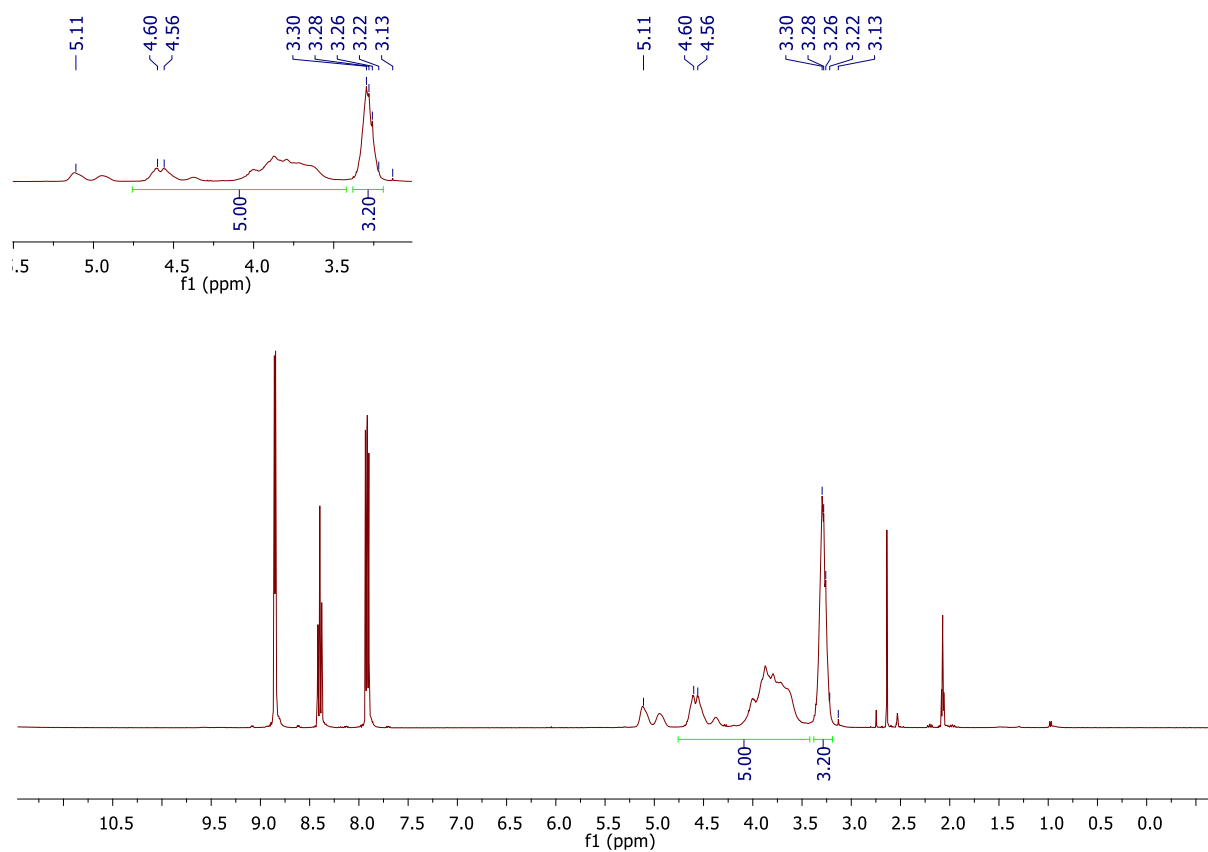

## Crude $^1\text{H}$ -NMR of hPG-OMs 2b

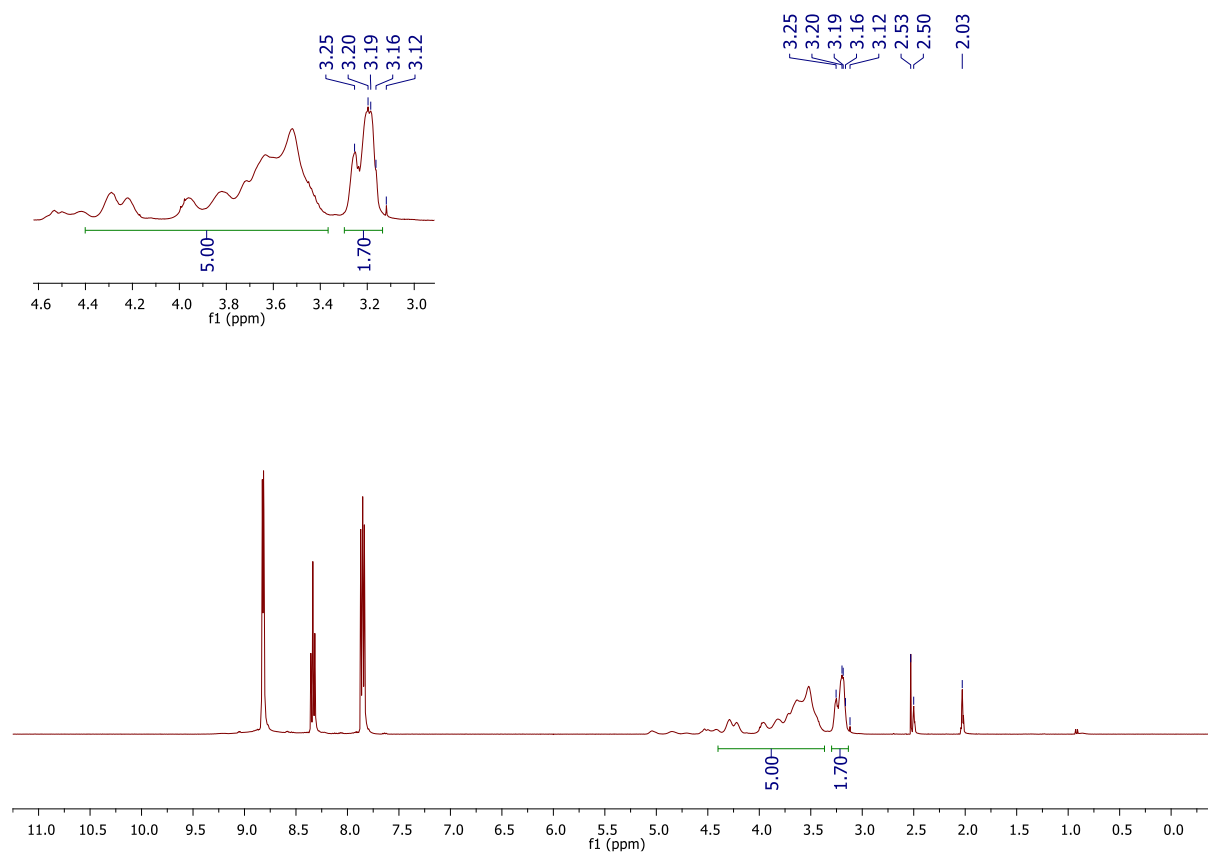

## Crude $^1\text{H}$ -NMR of hPG-OMs 2c

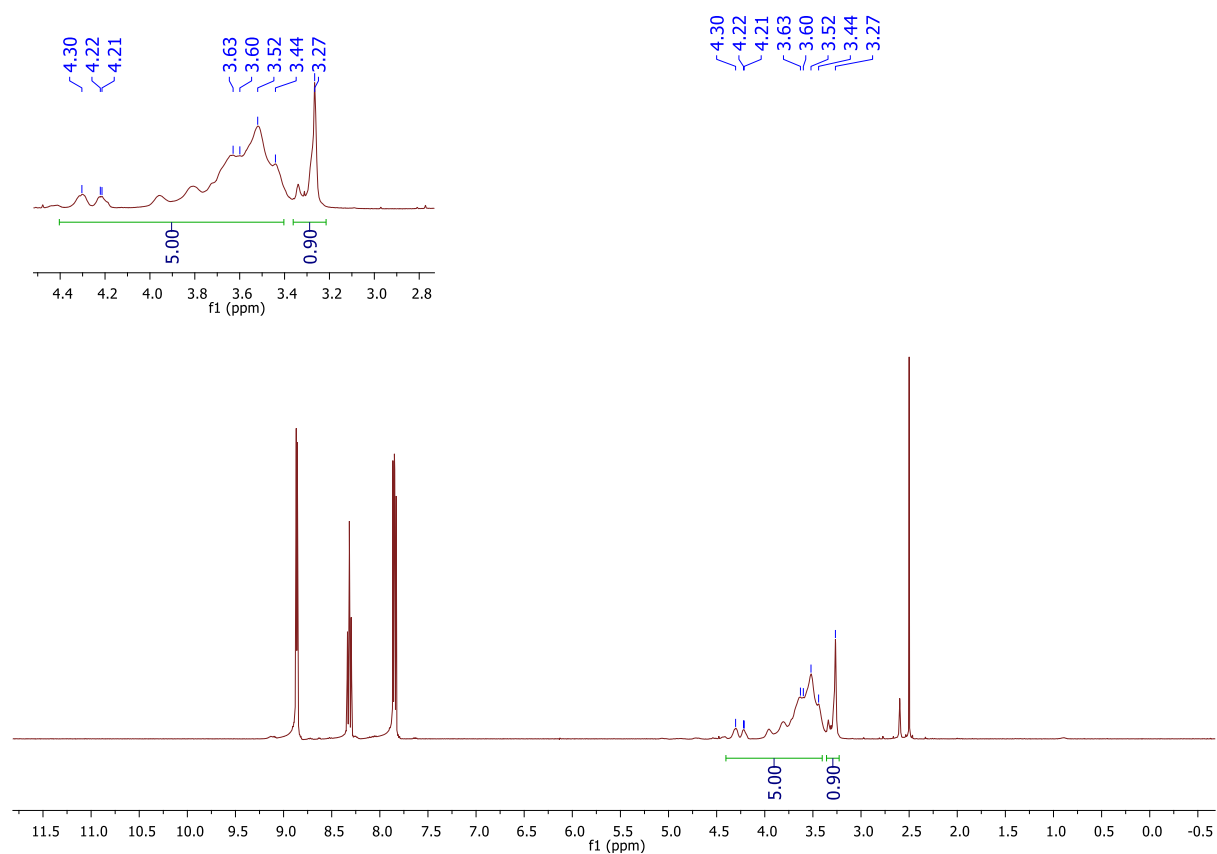

## FT-IR of hPG-N<sub>3</sub> 3a

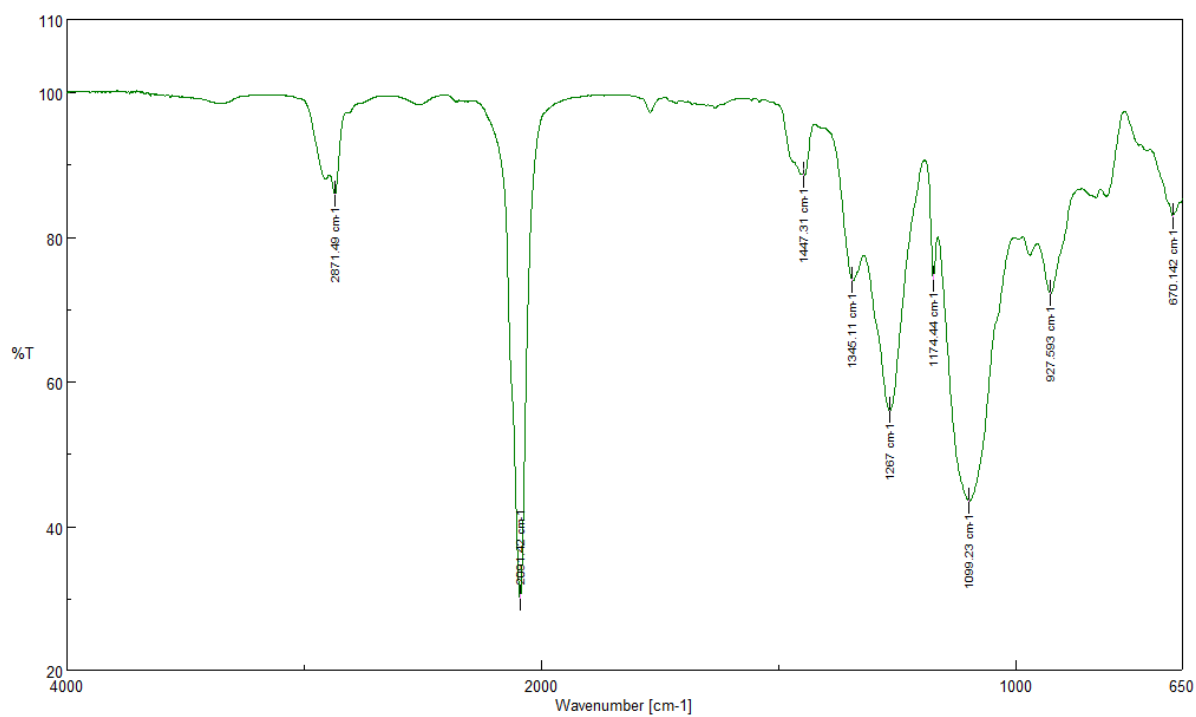

### FT-IR of hPG-N<sub>3</sub> 3b

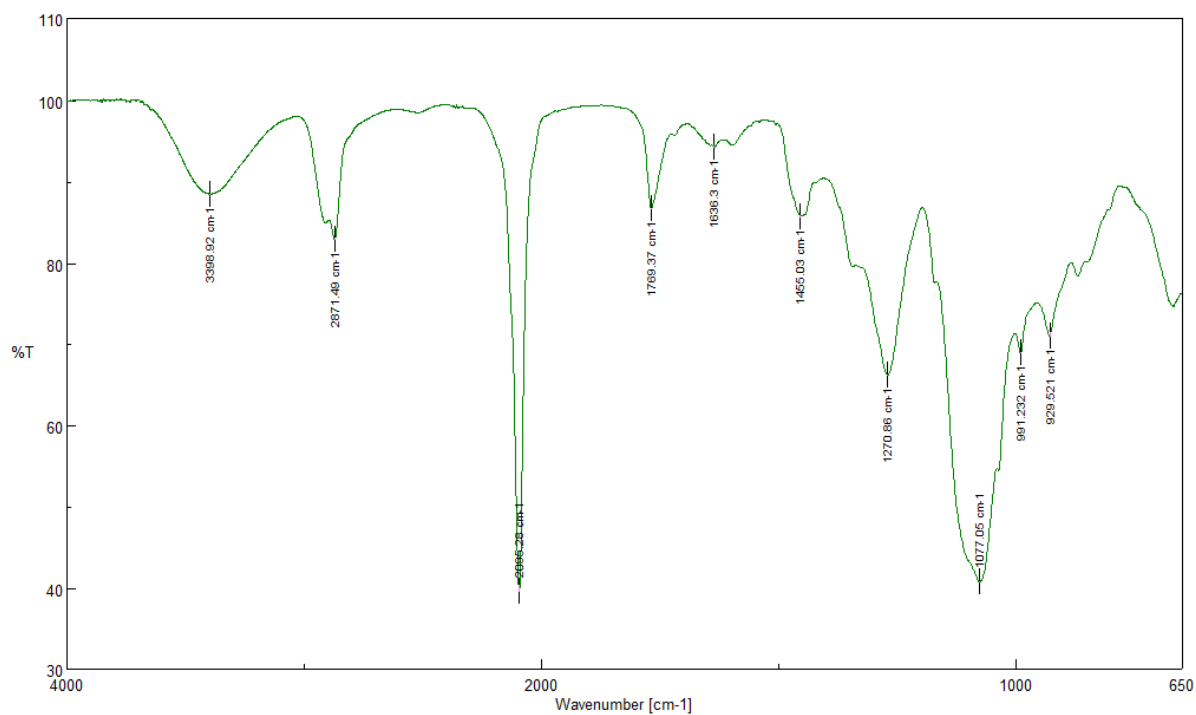

### FT-IR of hPG-N<sub>3</sub> 3c

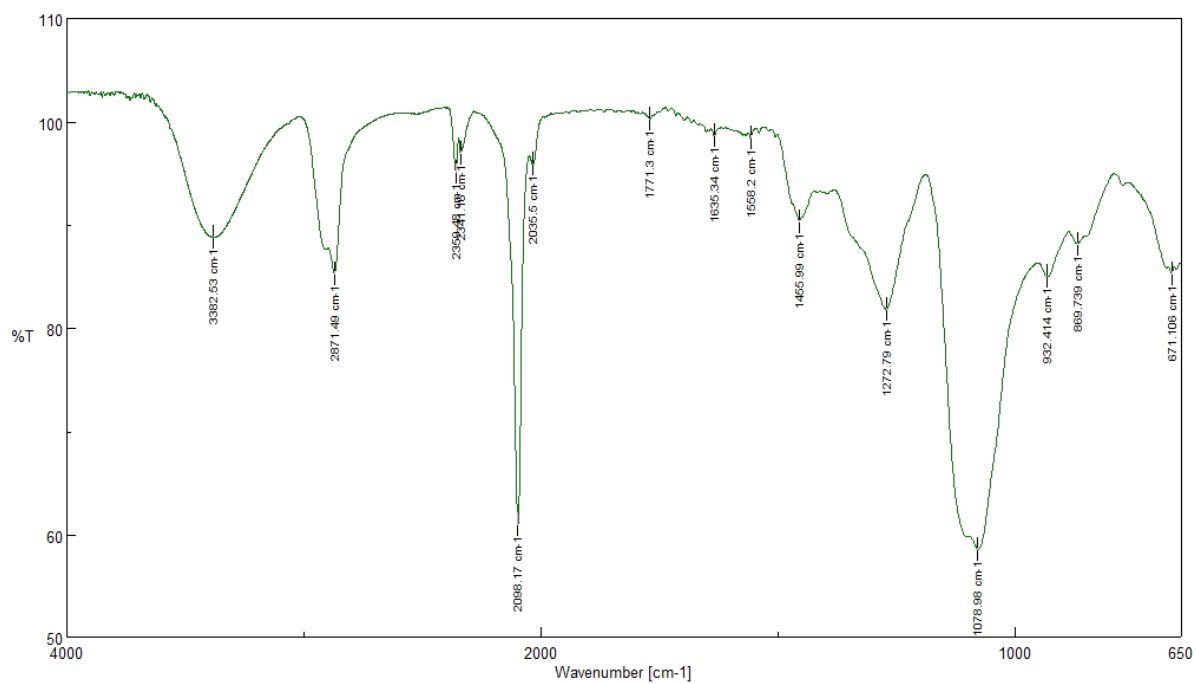



**$^1\text{H}$ ,  $^{13}\text{C}$ -NMR and FT-IR of compound 4a**

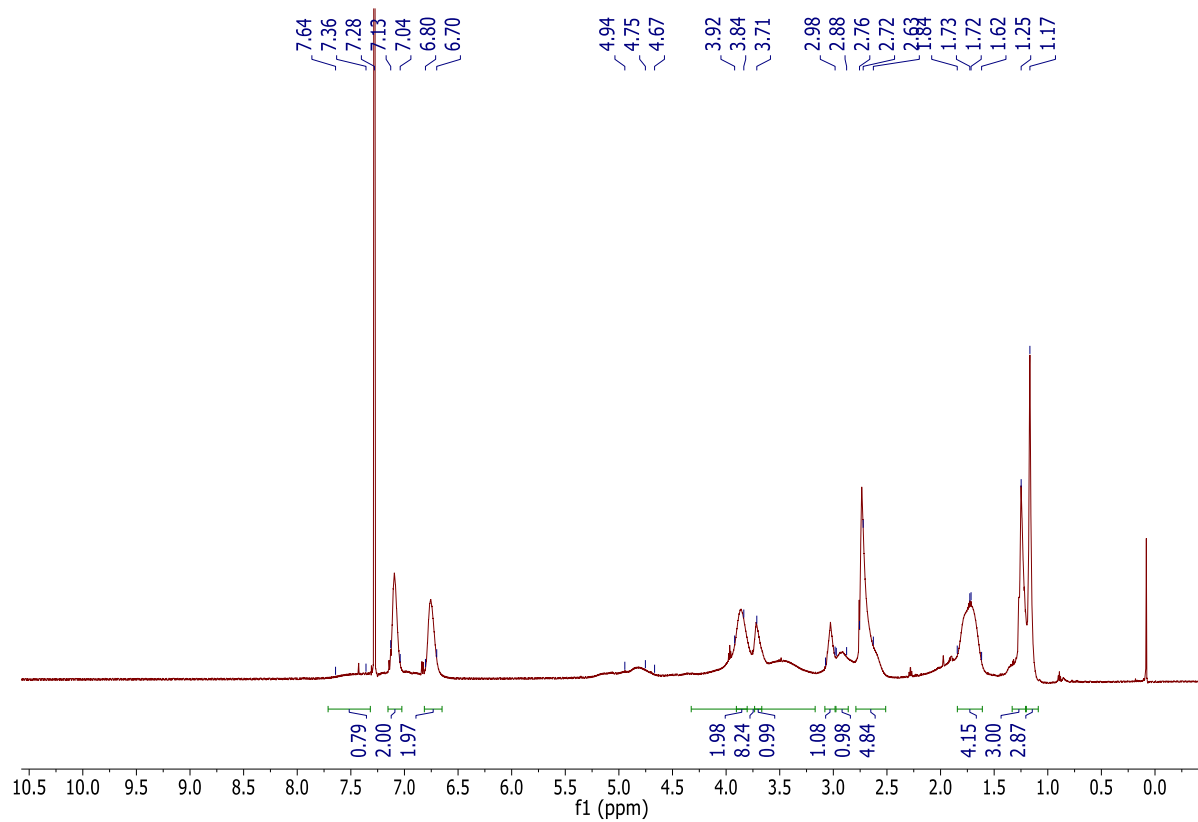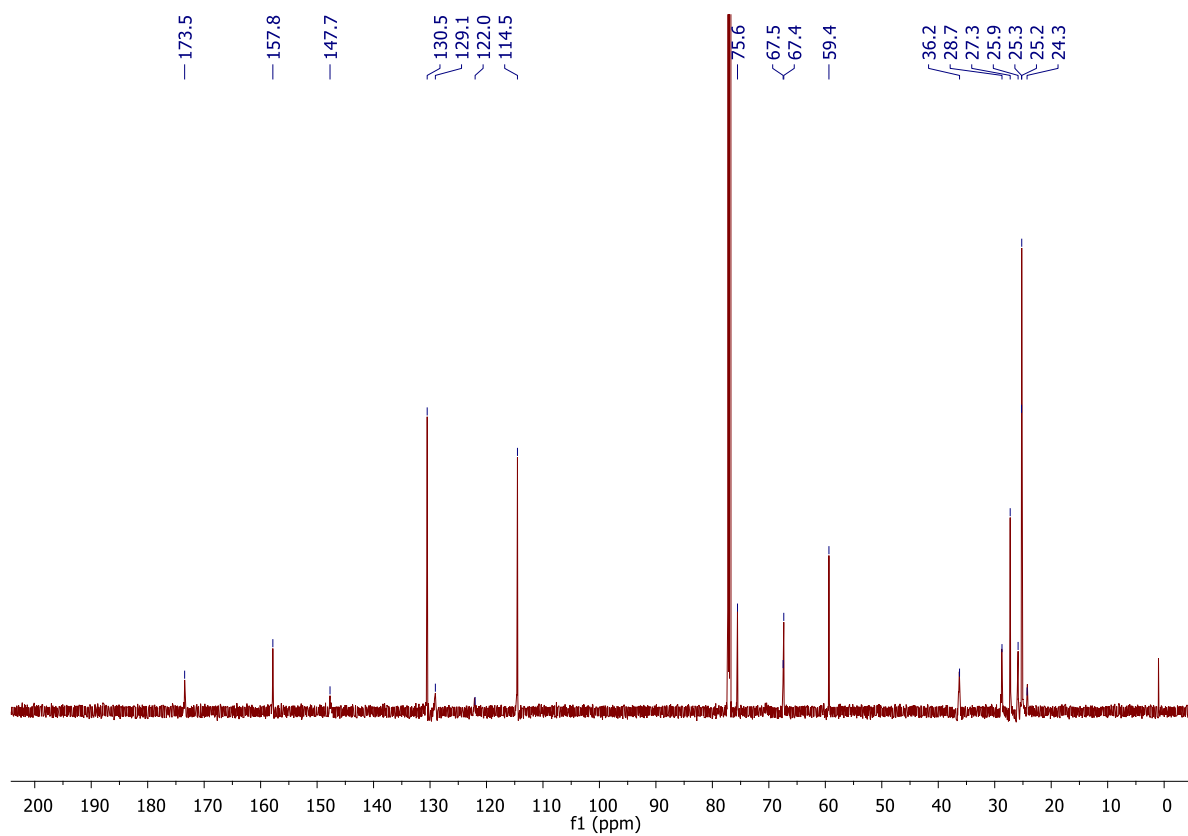

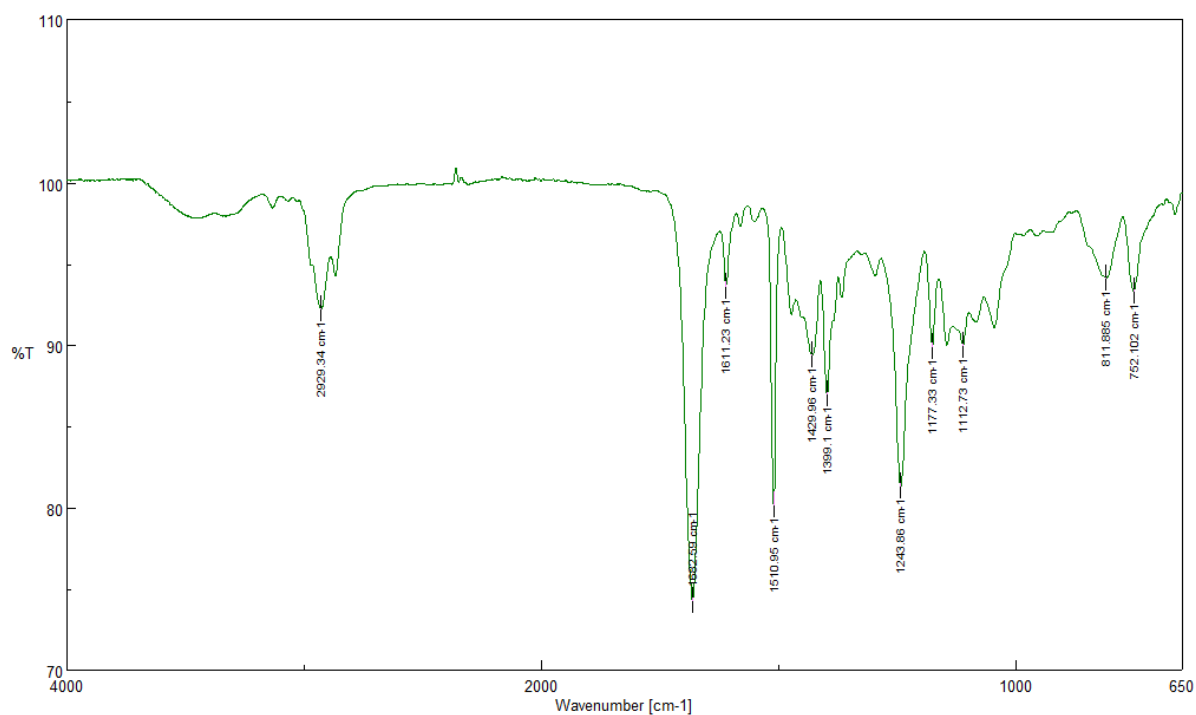

# <sup>1</sup>H, <sup>13</sup>C-NMR and FT-IR of compound 4b

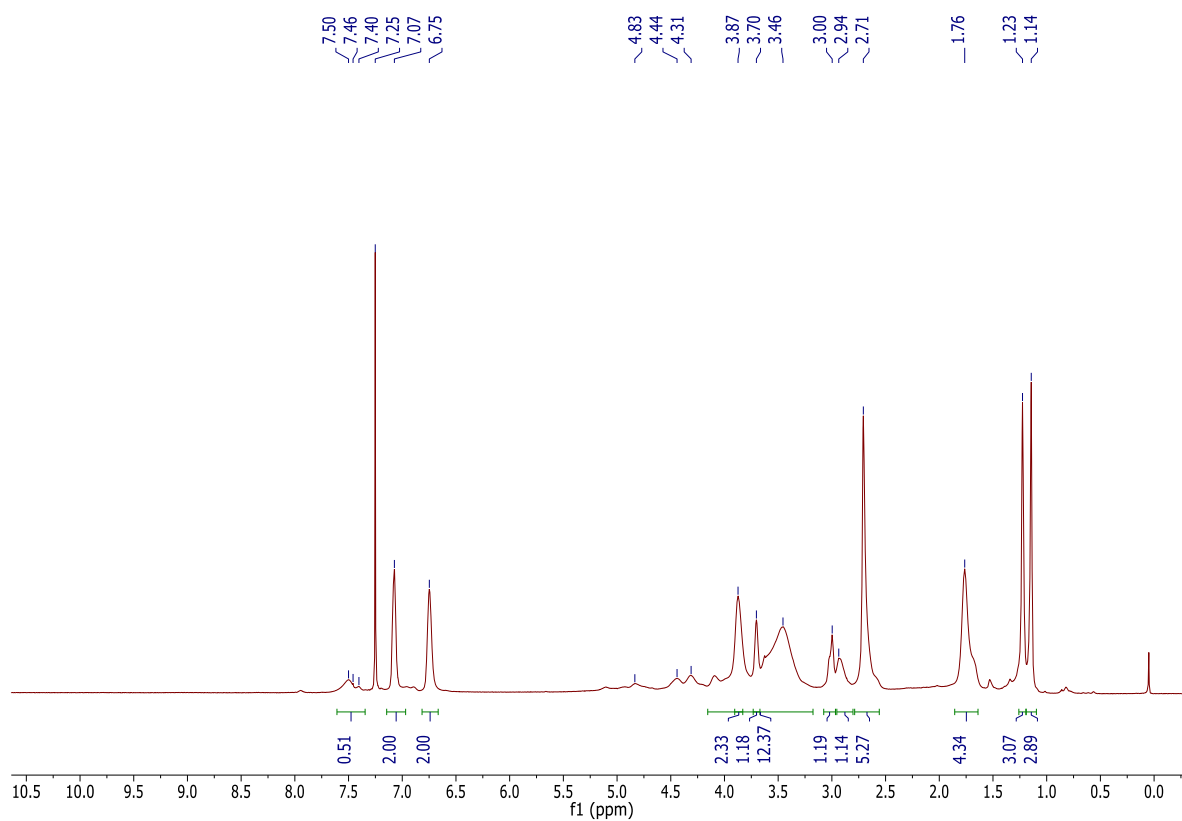

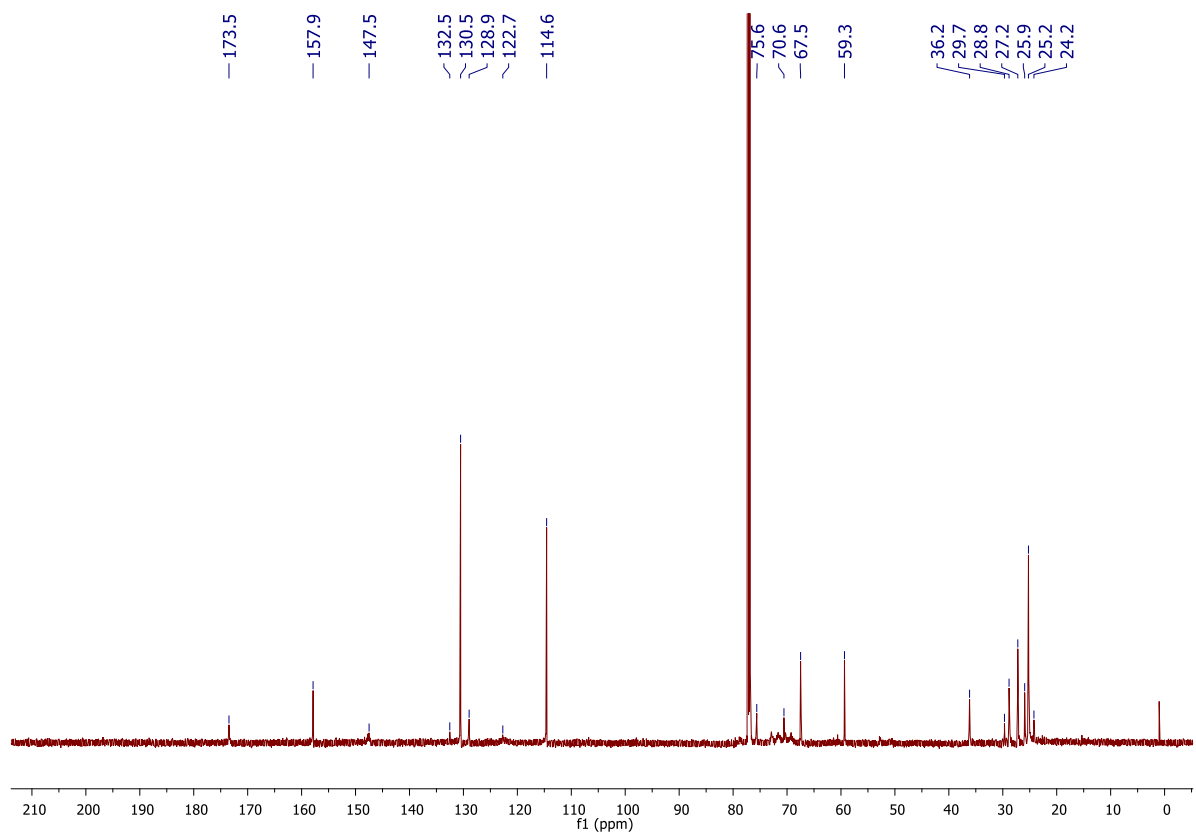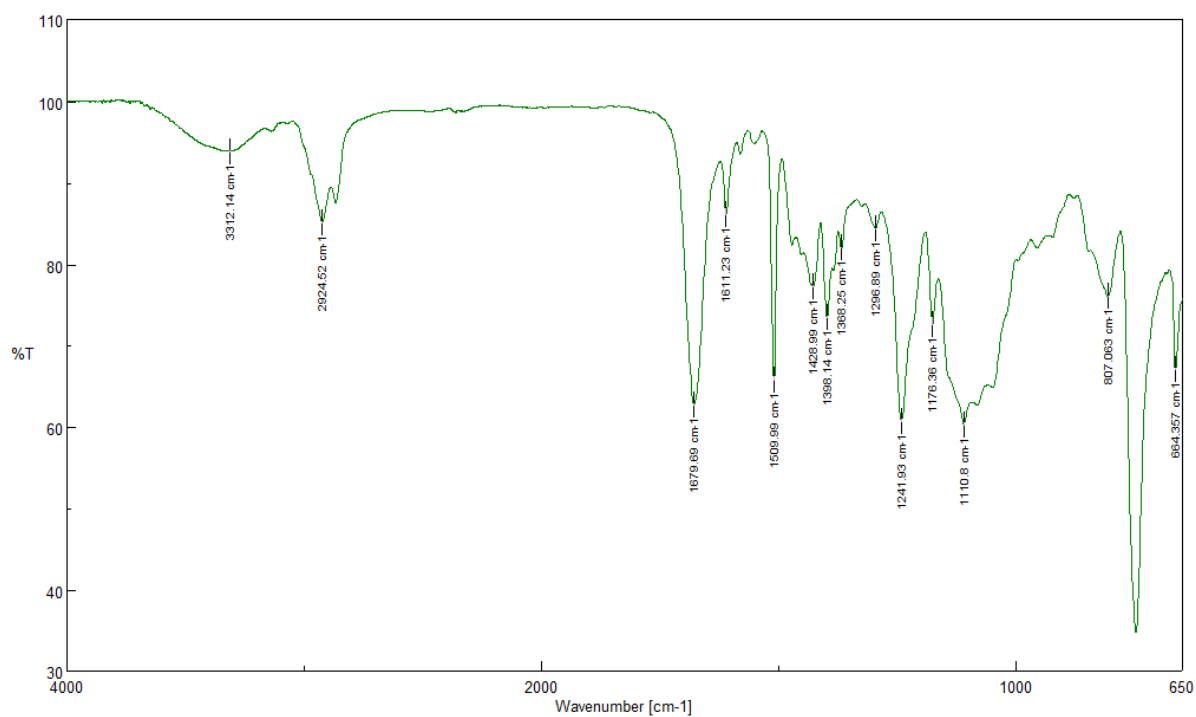

**$^1\text{H}$ ,  $^{13}\text{C}$ -NMR and FT-IR of compound 4c**

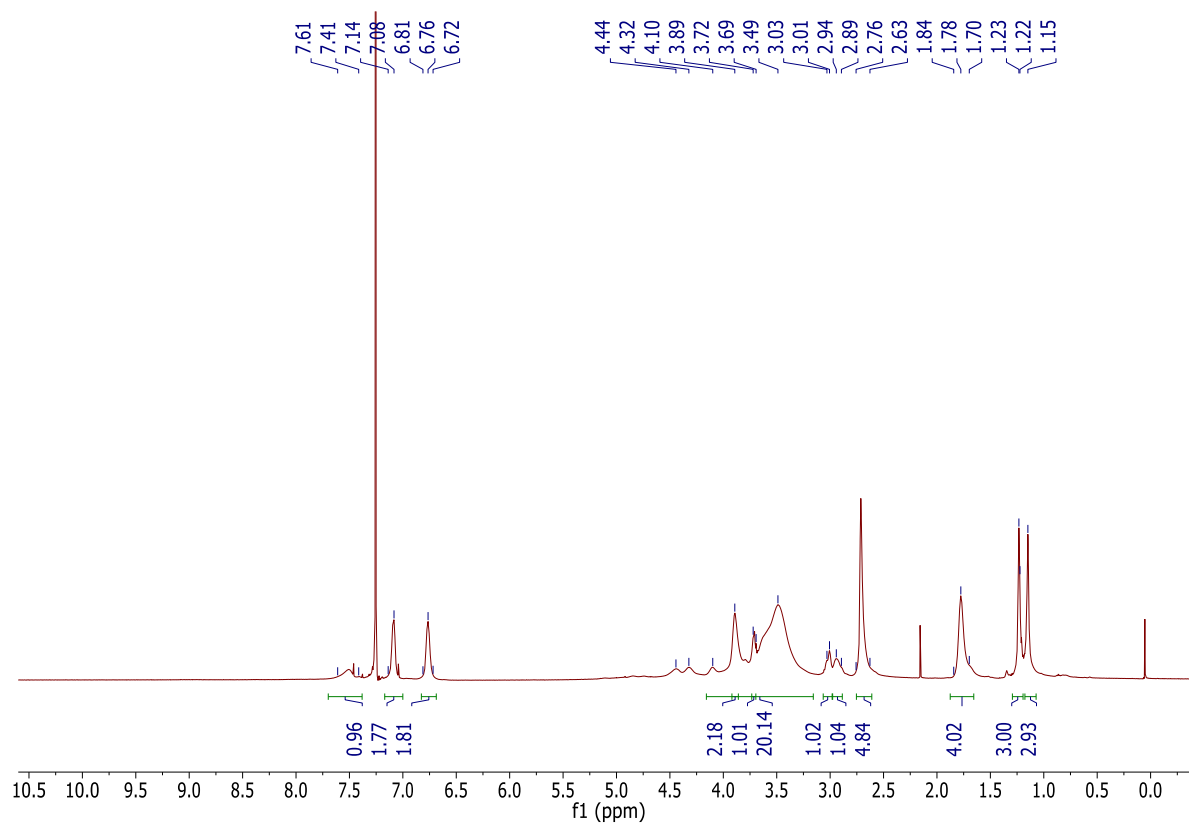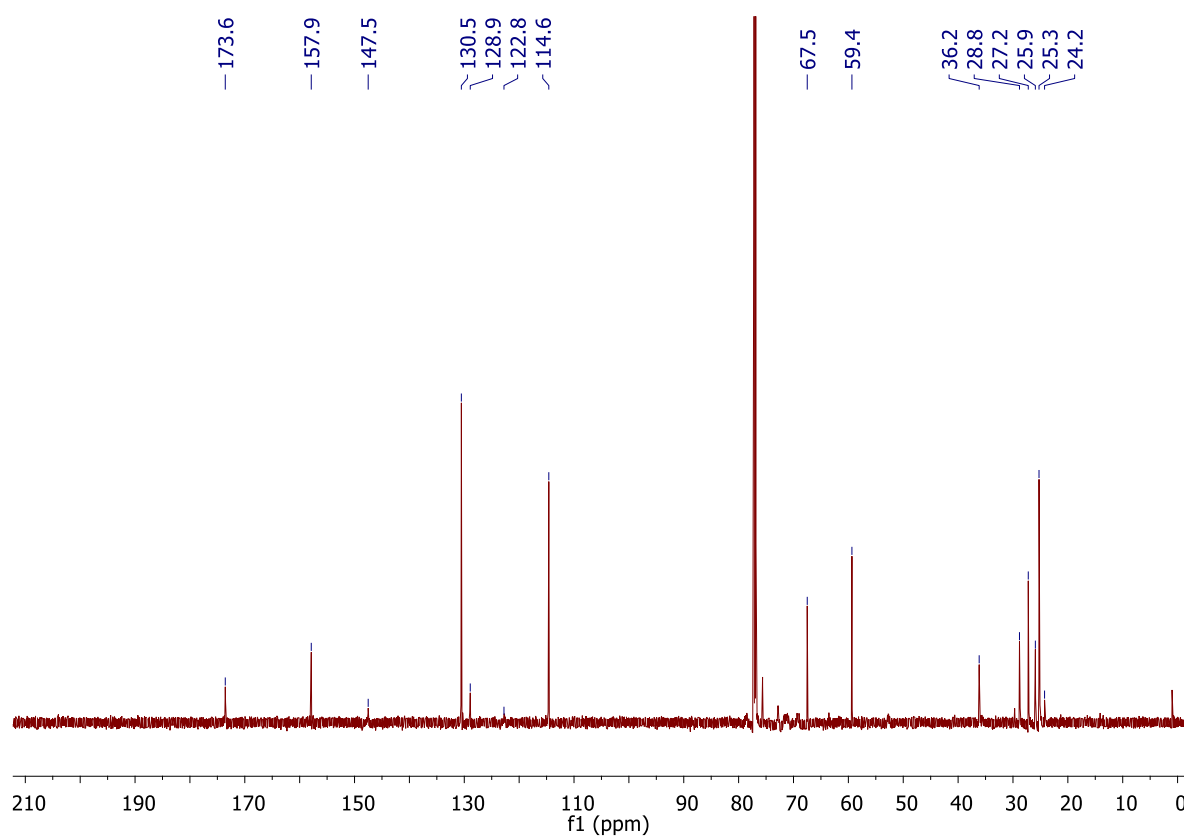

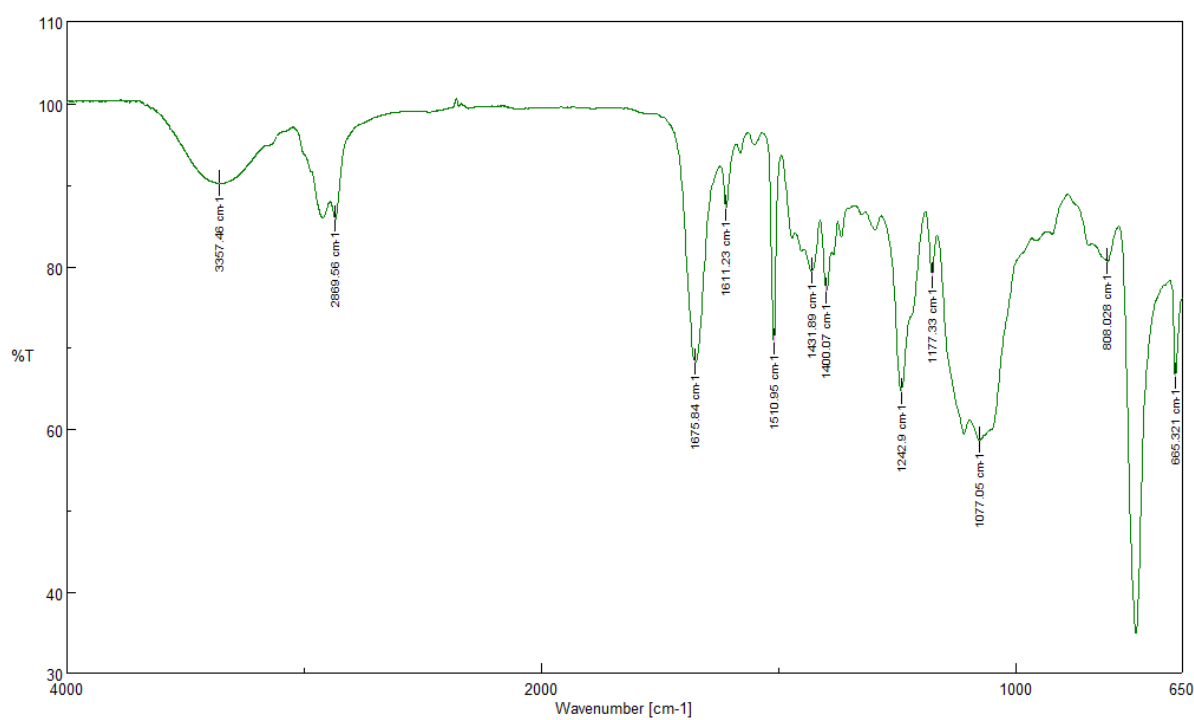

# <sup>1</sup>H and <sup>13</sup>C-NMR of compound 7

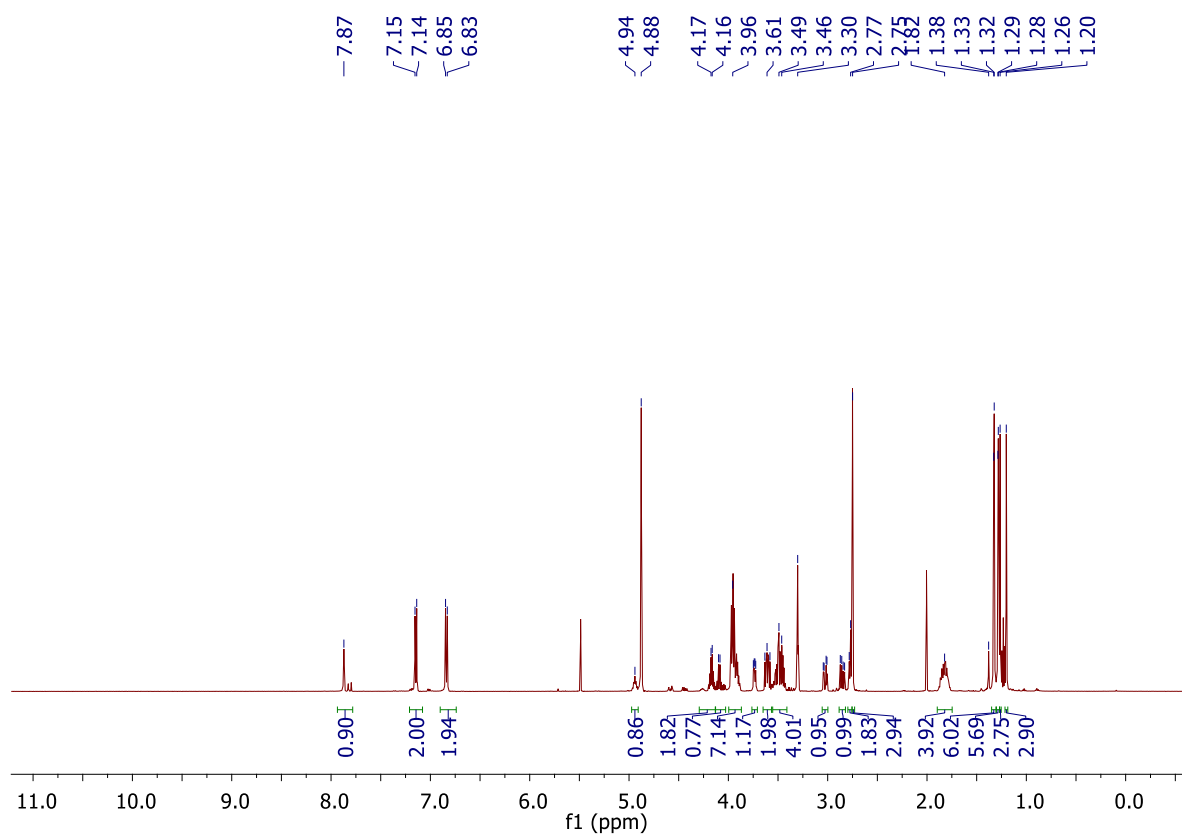

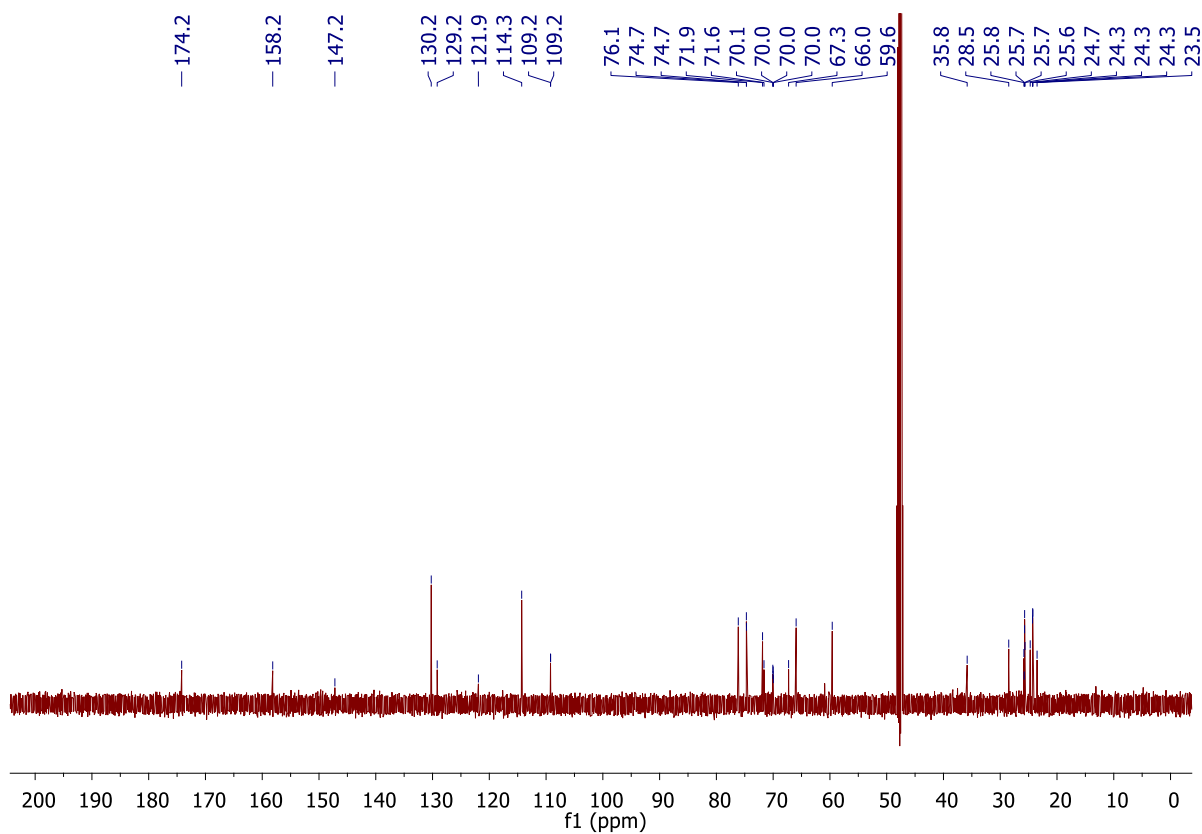

# **$^1\text{H}$ and $^{13}\text{C}$ -NMR of compound 8**

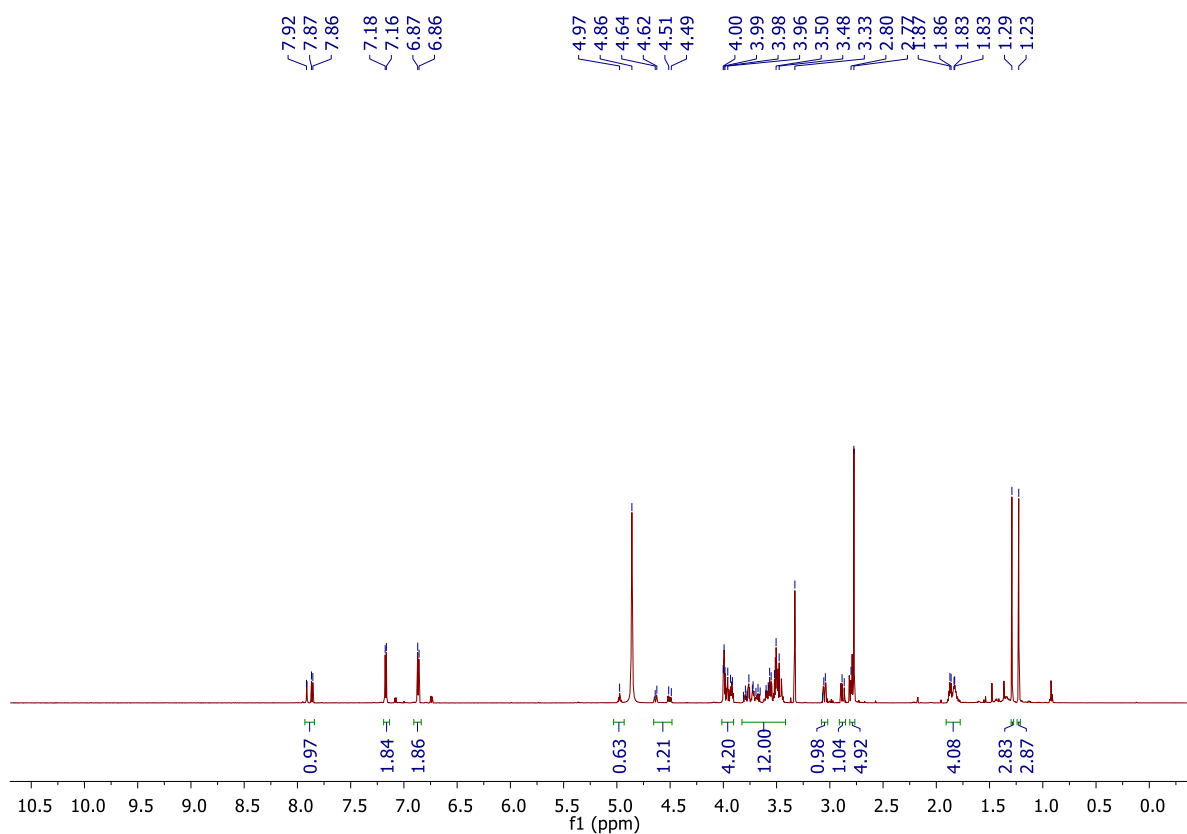

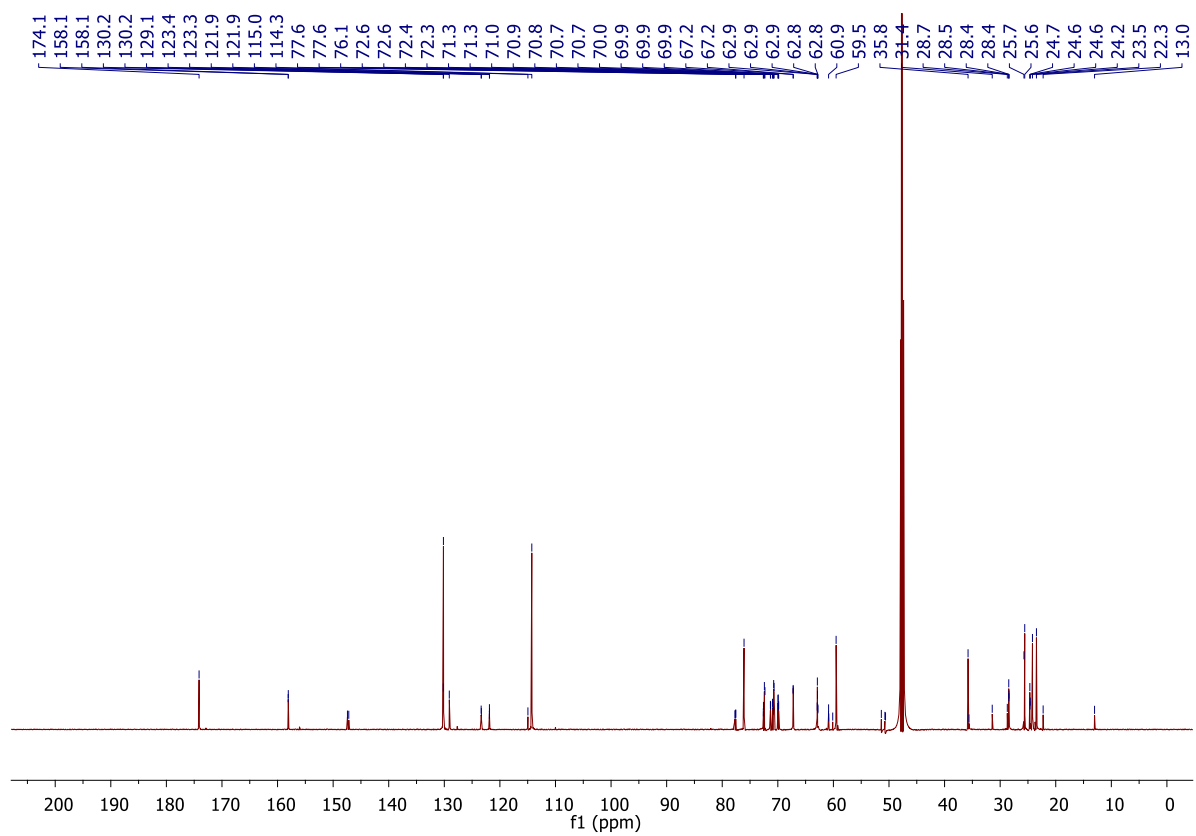

## Friedel–Crafts alkylations products

### $^1\text{H}$ and $^{13}\text{C}$ -NMR of compound 13

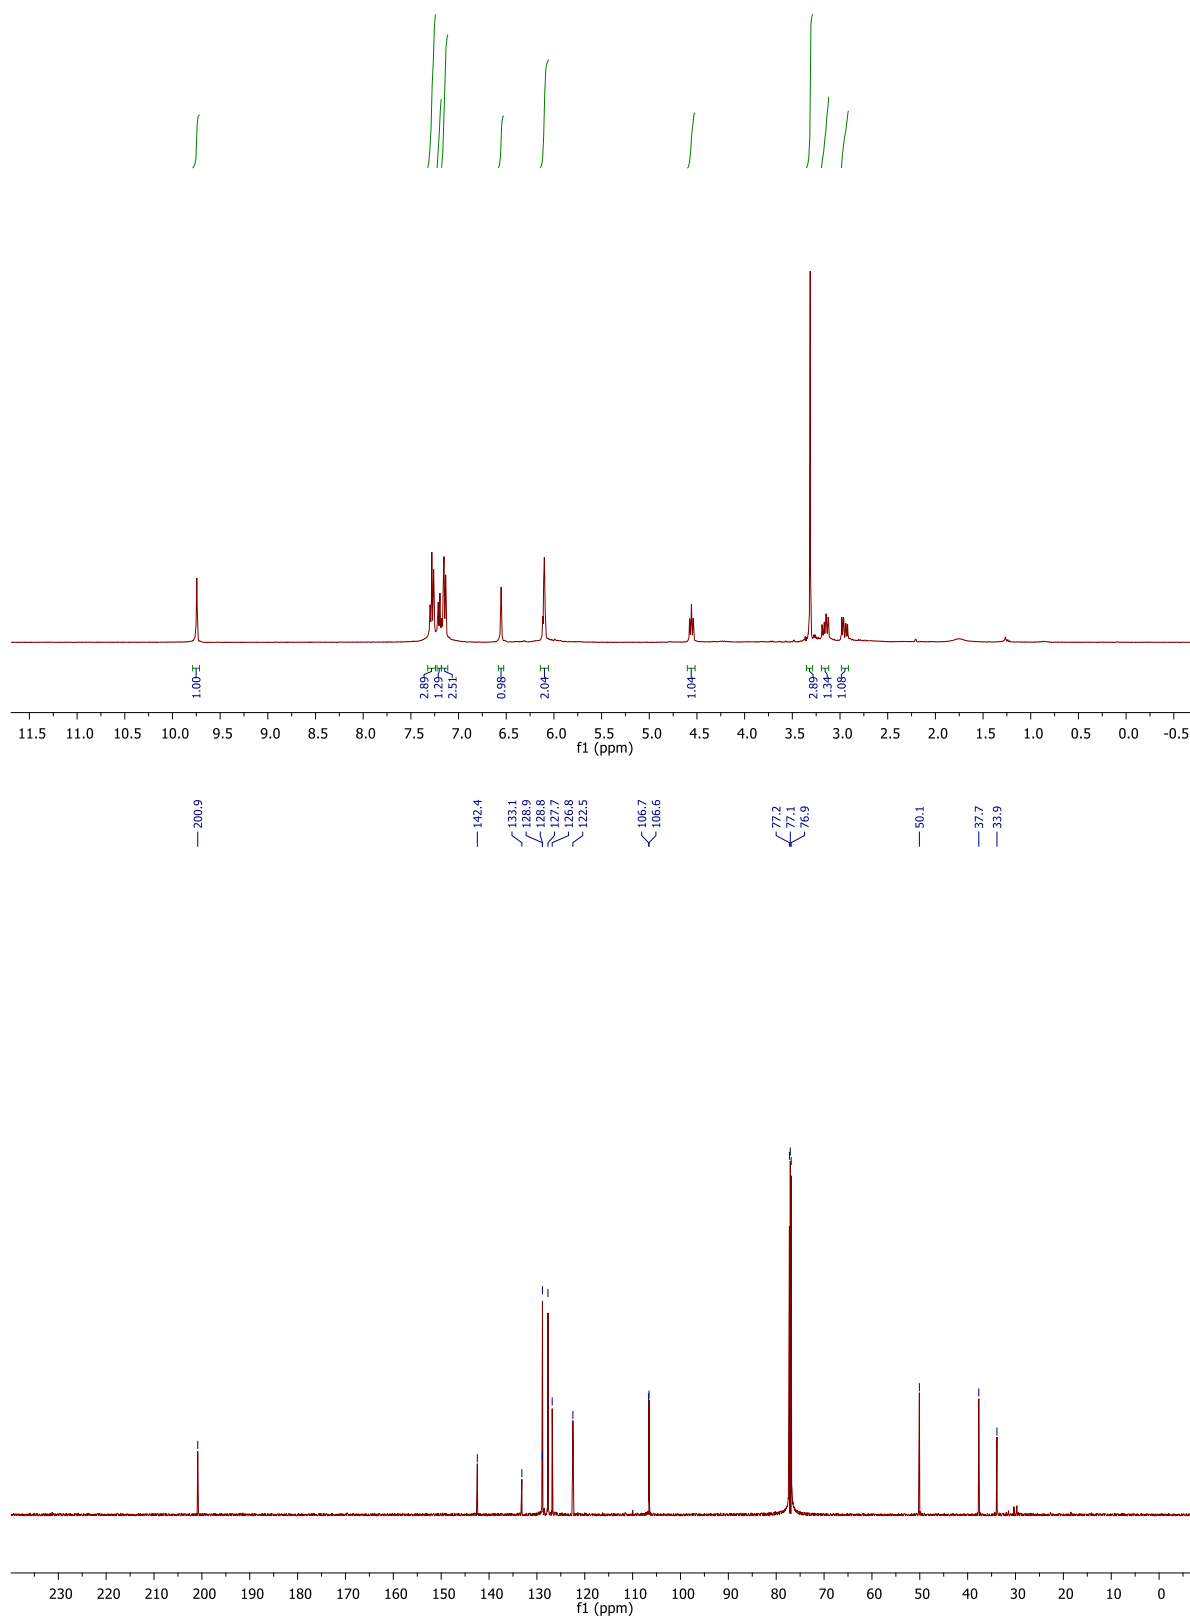



# $^1\text{H}$ and $^{13}\text{C}$ -NMR of compound 15a

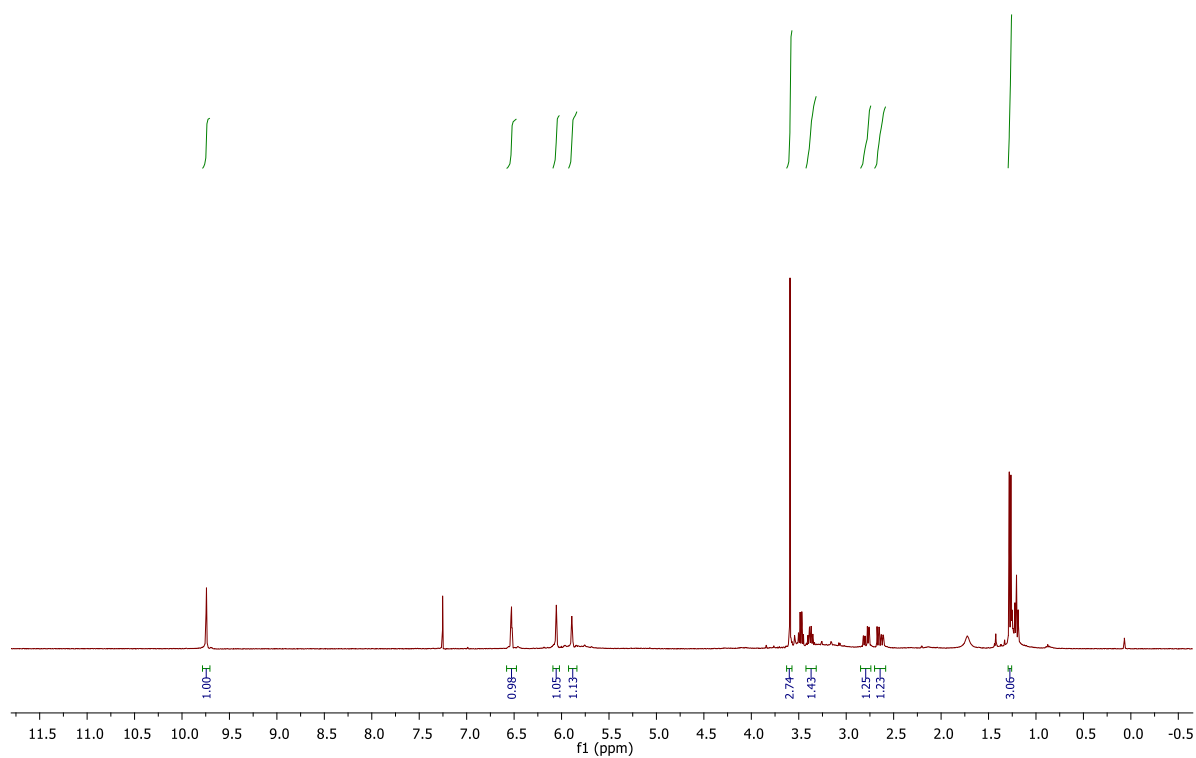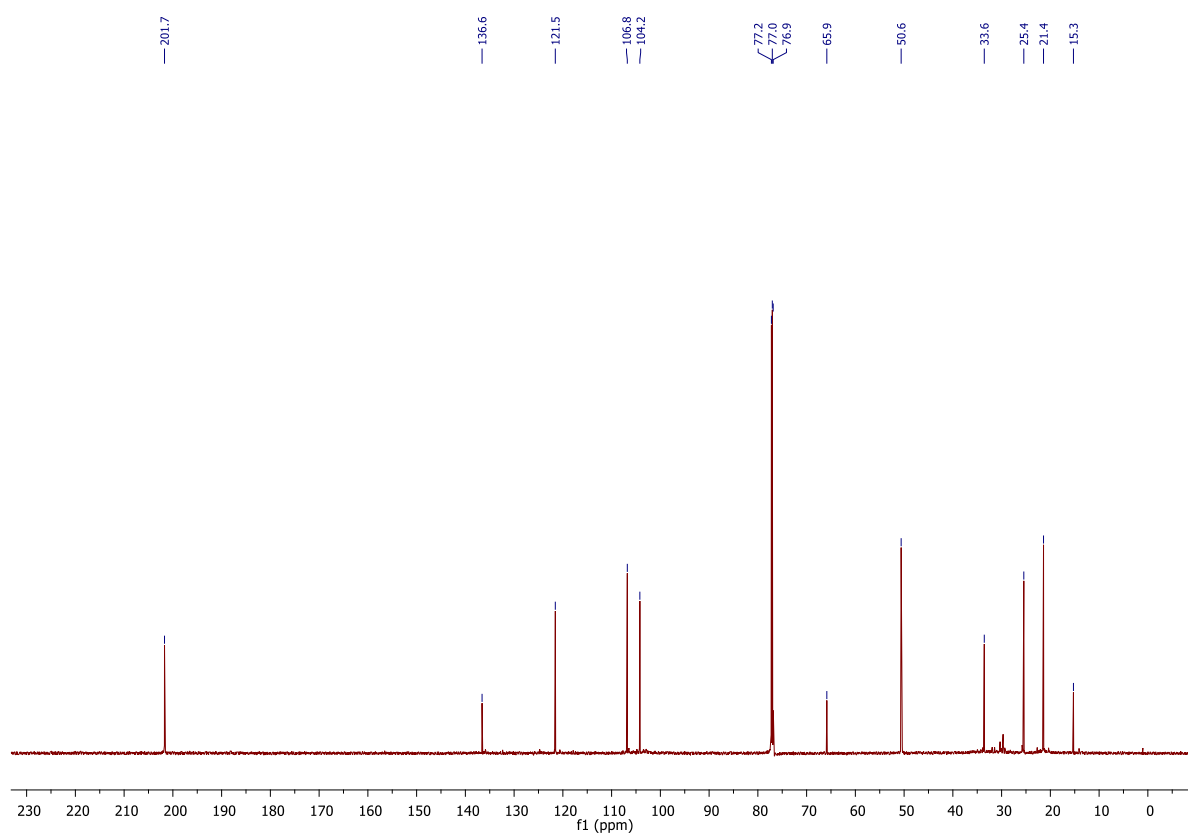

# $^1\text{H}$ and $^{13}\text{C}$ -NMR of compound 15b

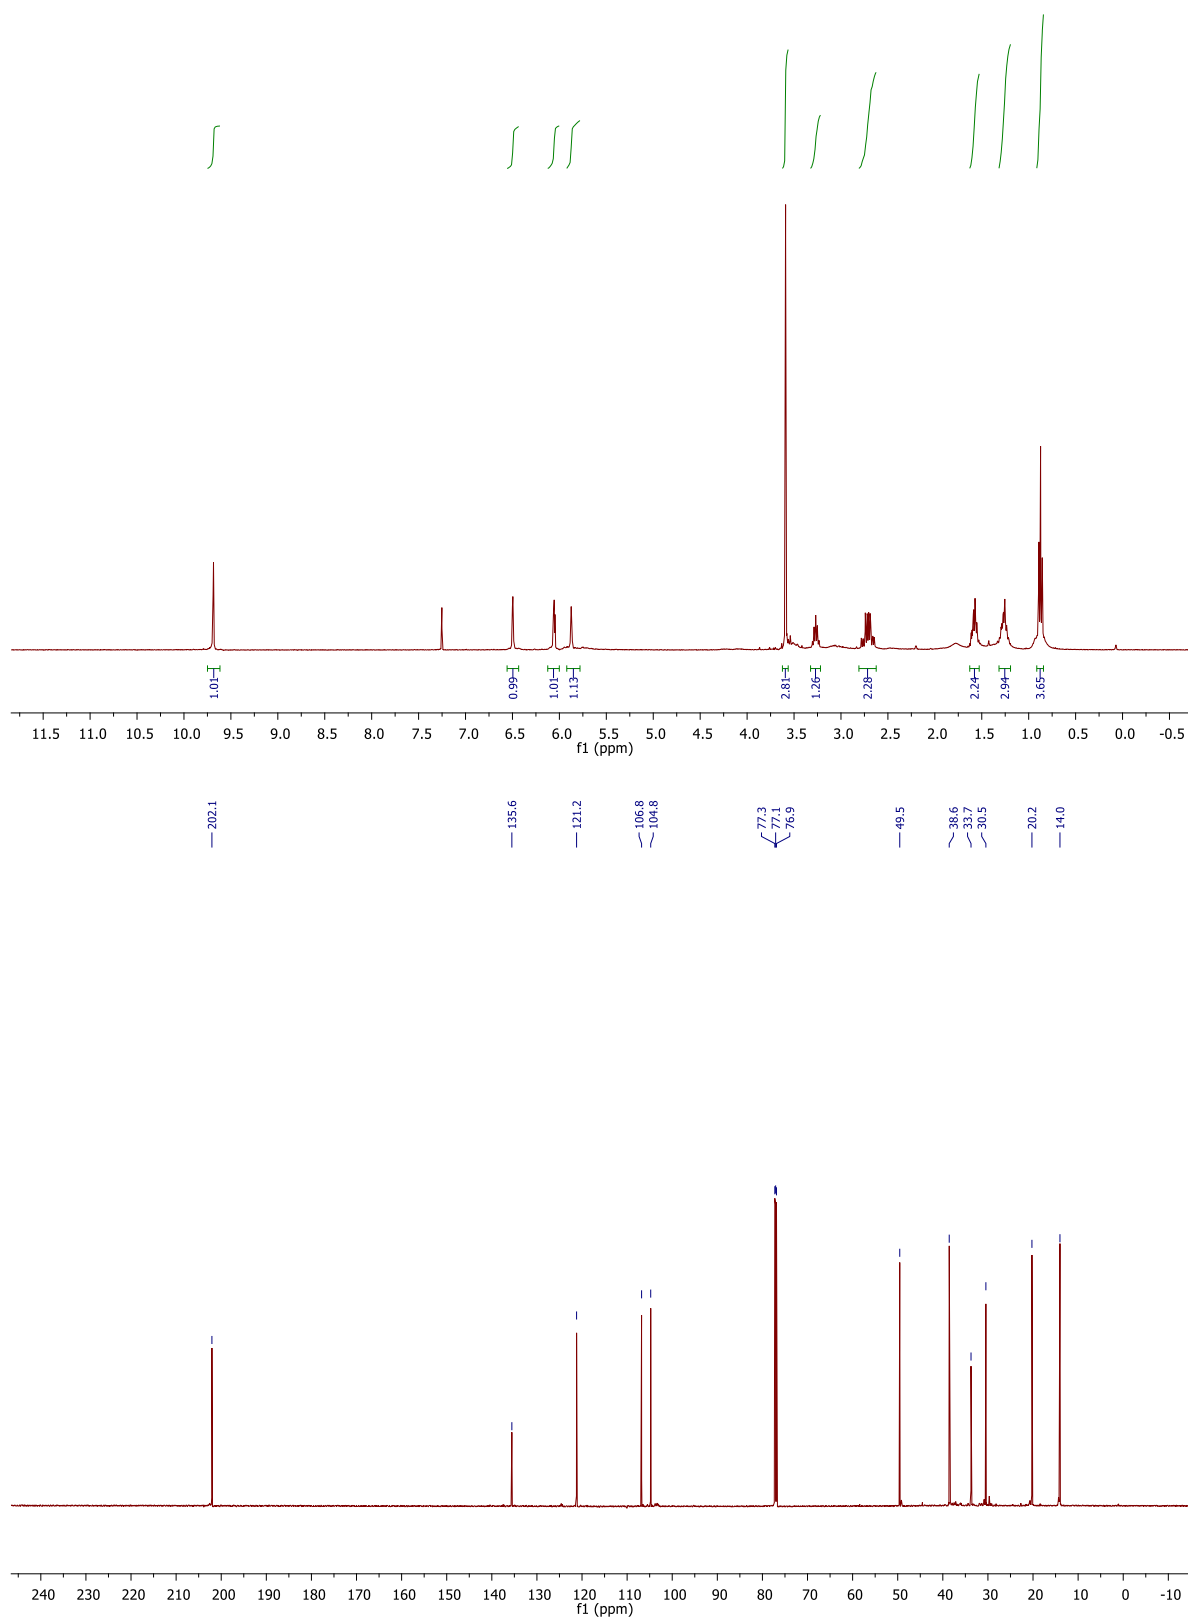

# <sup>1</sup>H and <sup>13</sup>C-NMR of compound 15c

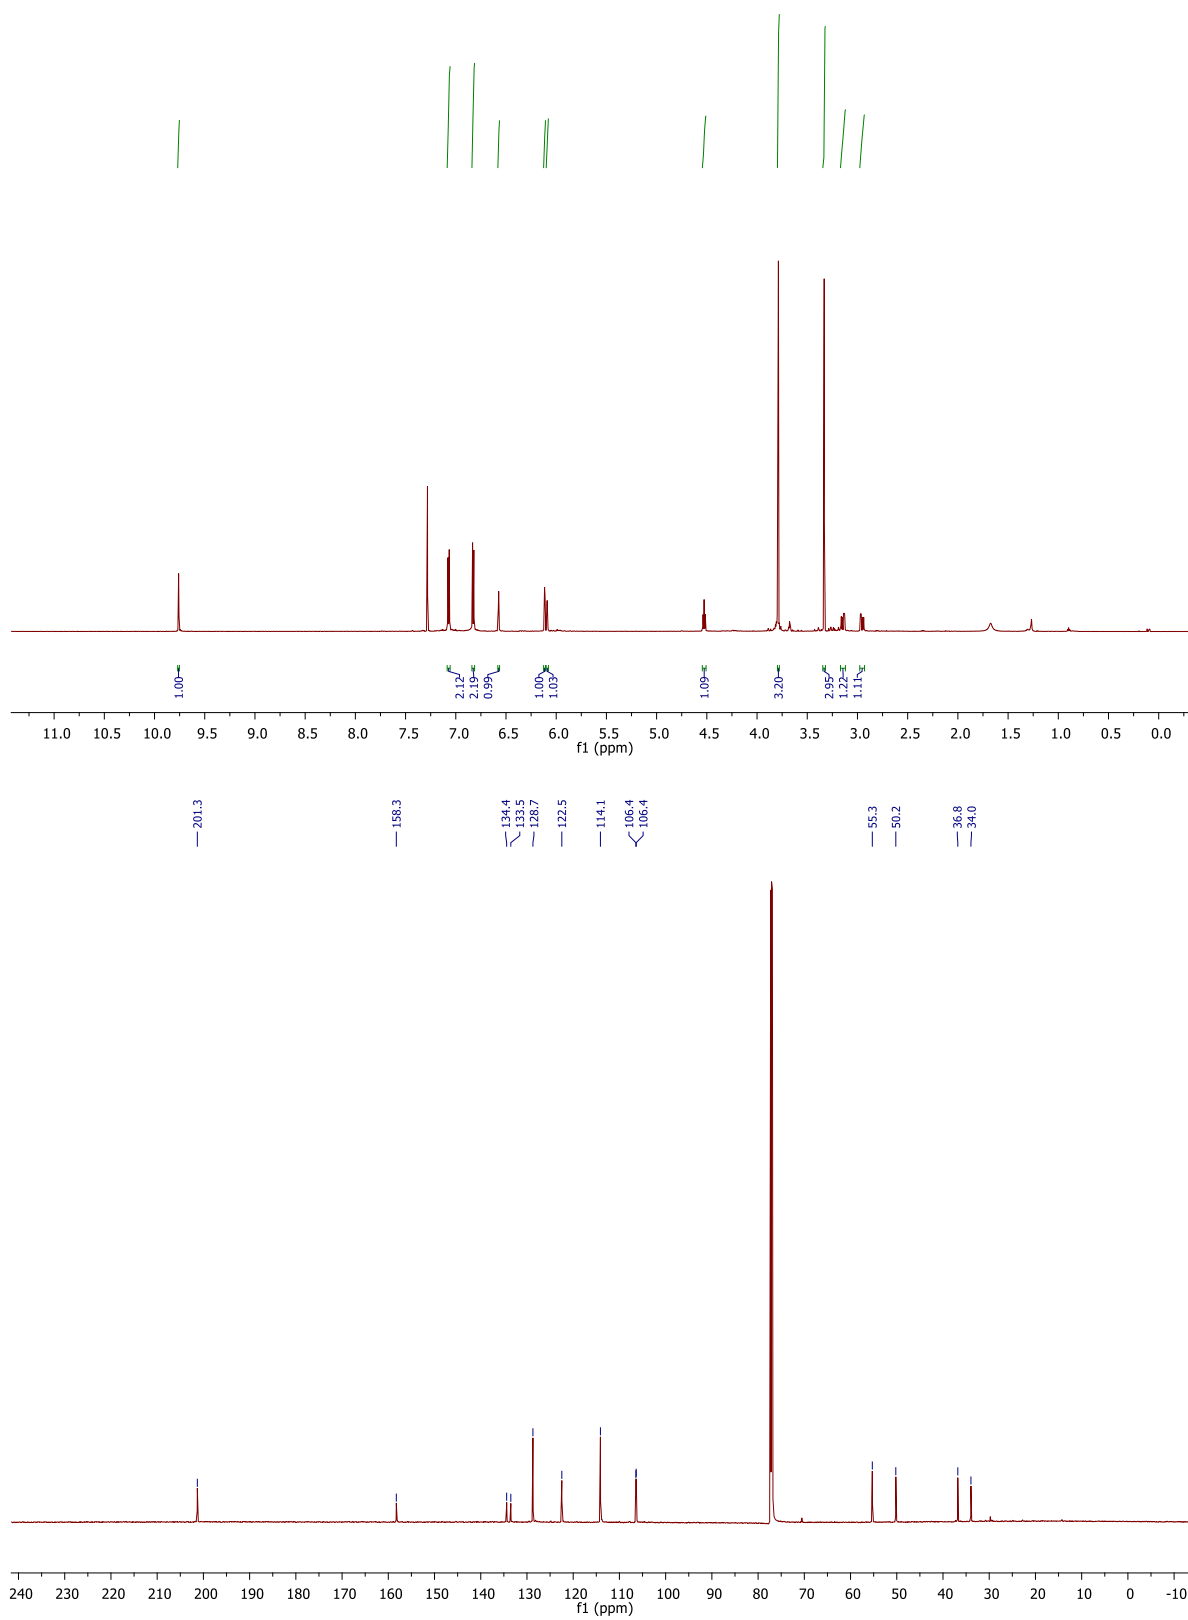

# $^1\text{H}$ and $^{13}\text{C}$ -NMR of compound 15d

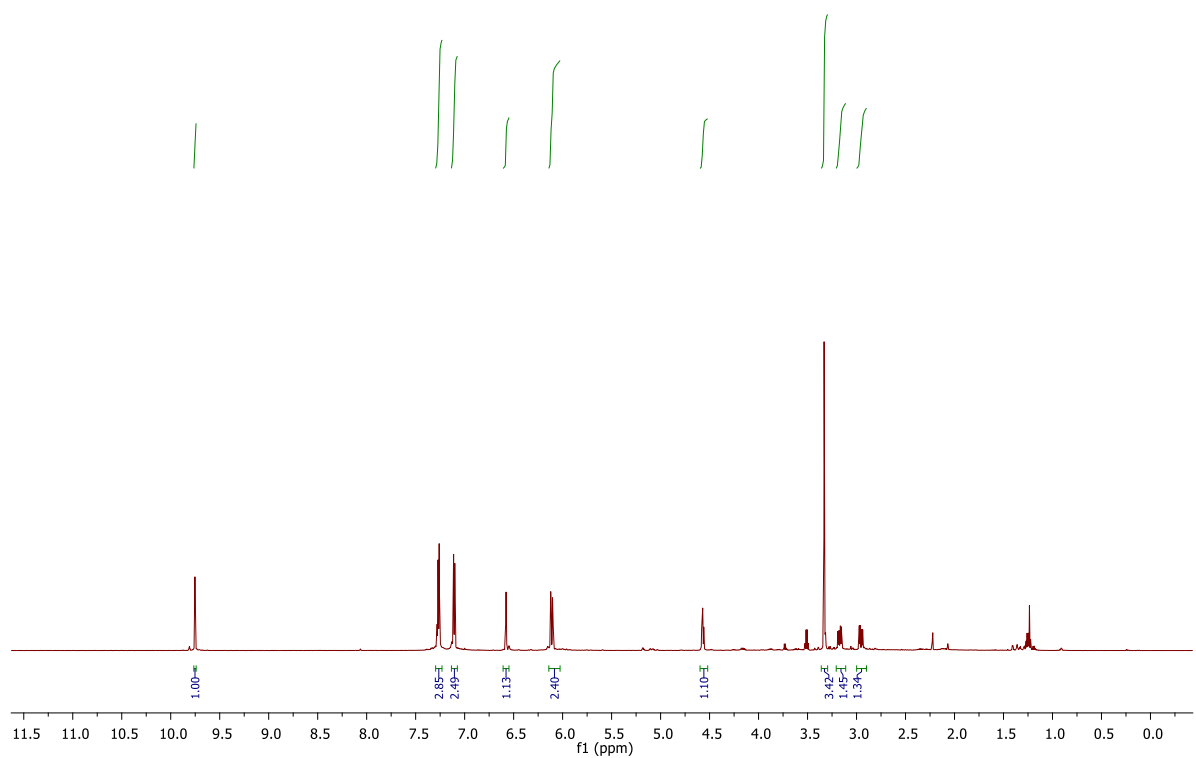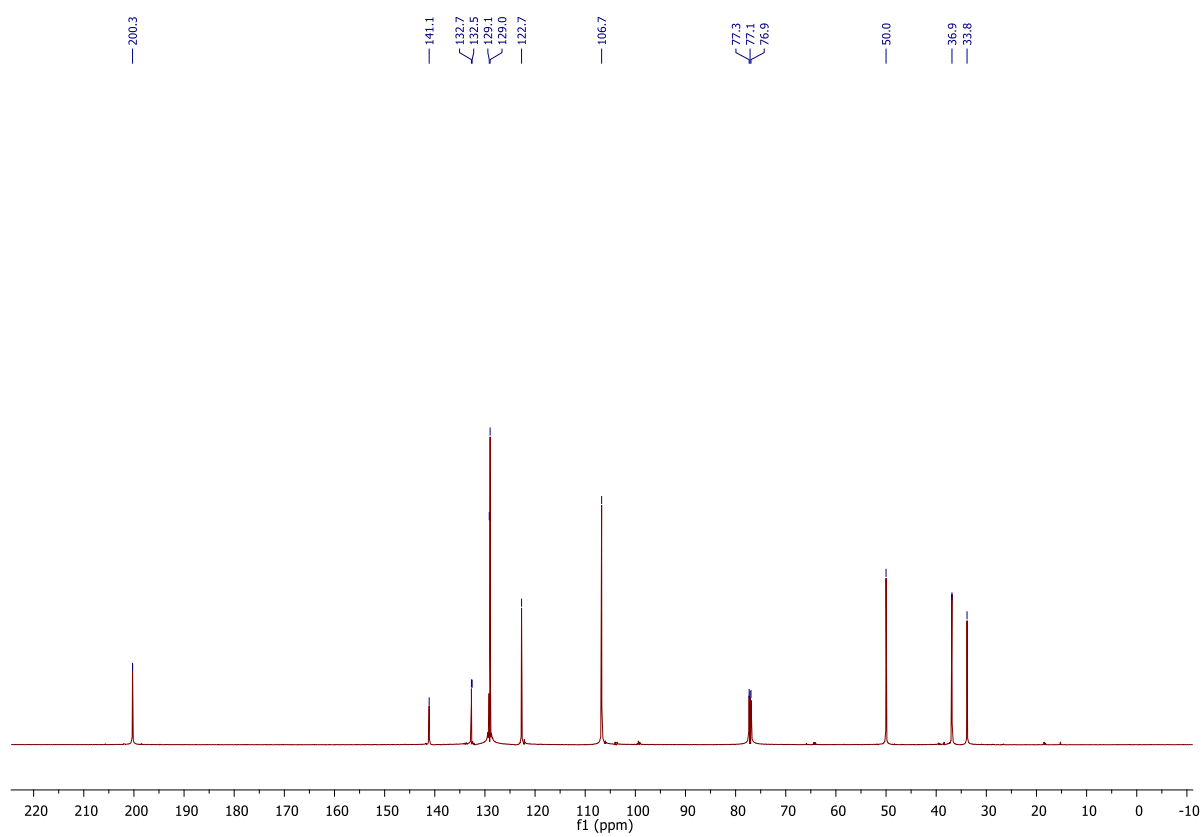

# <sup>1</sup>H and <sup>13</sup>C-NMR of compound 15e

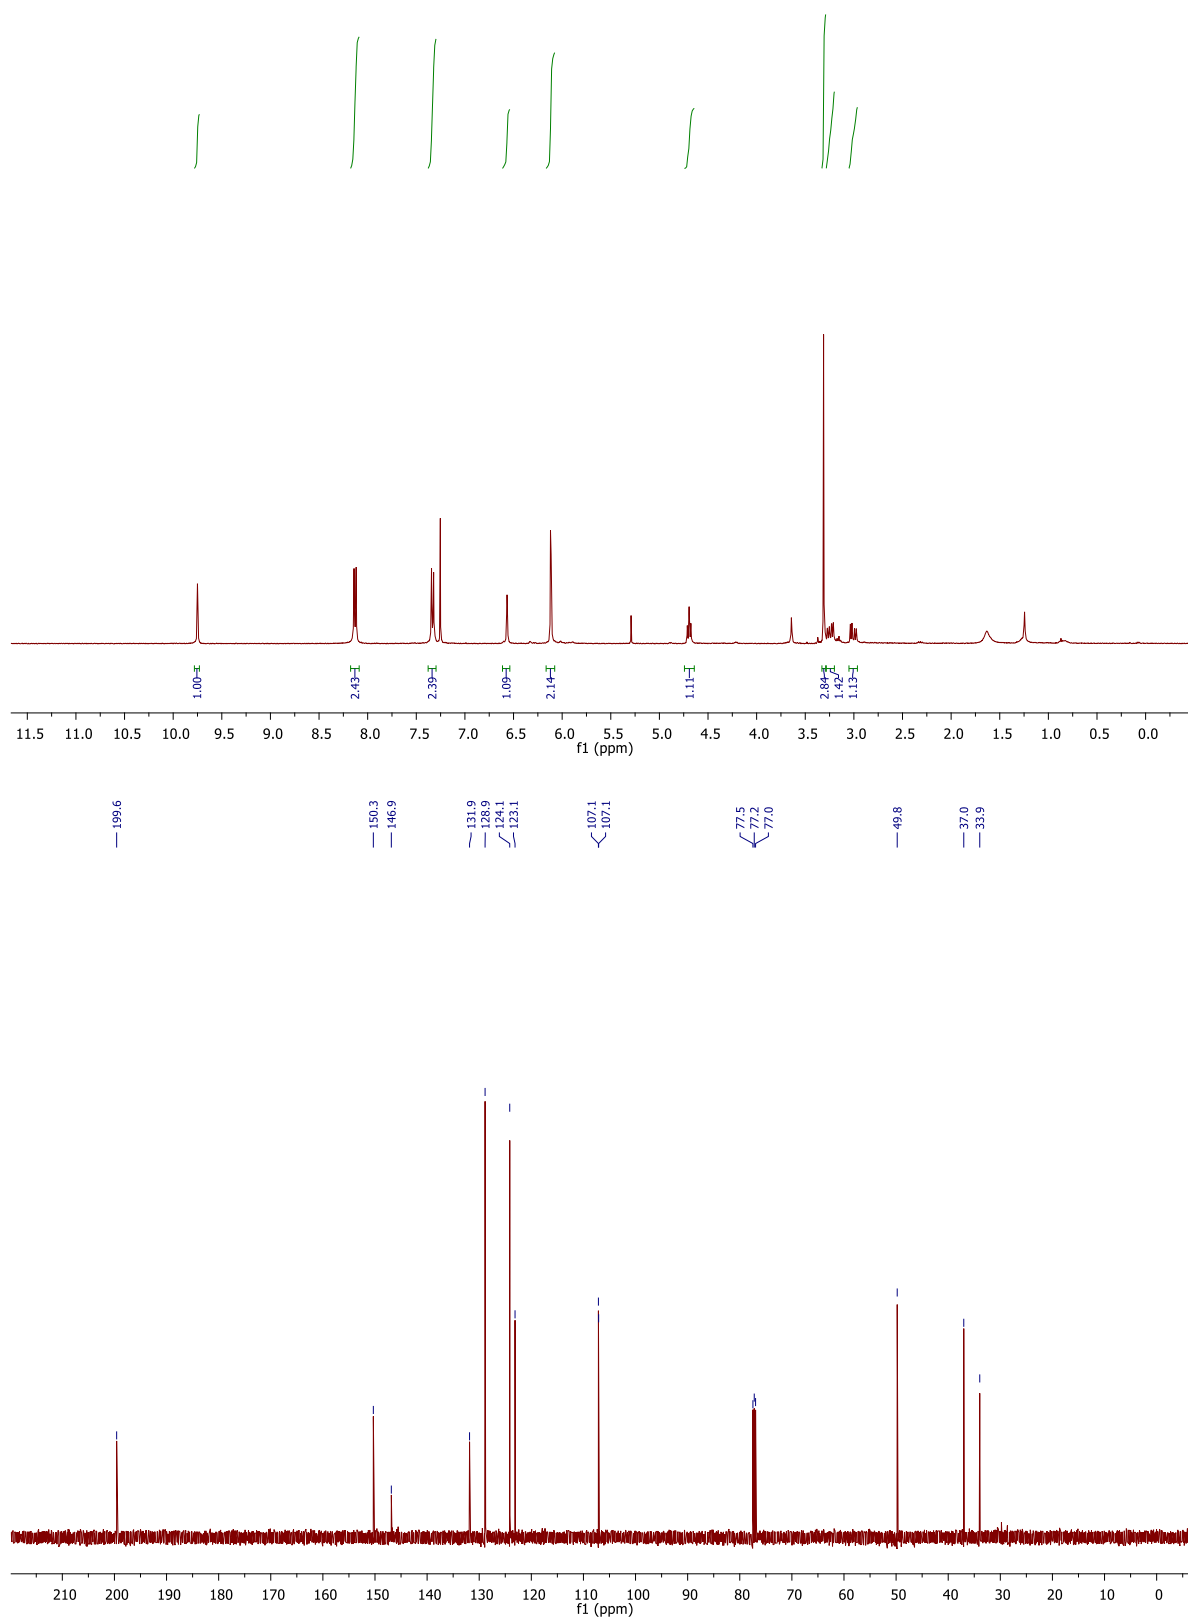

## 6. GC reports

### Racemic 13.

Sample Info : Hydrodex- $\beta$ -TBDAC  
 120 °C 200 min  
 1.1 mL/min He  
 50:1 split, 5  $\mu$ L injection  
 racemic

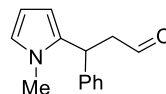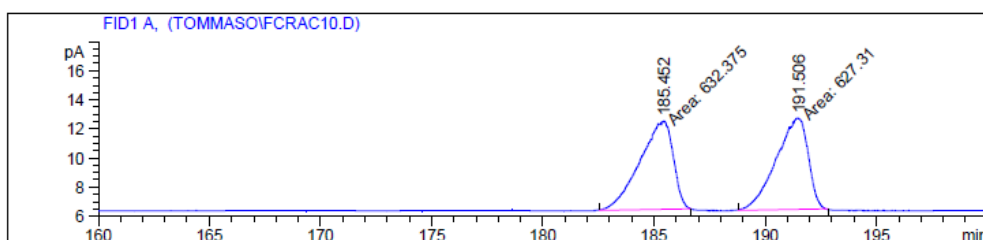

| Peak # | RetTime [min] | Type | Width [min] | Area [pA*s] | Height [pA] | Area %   |
|--------|---------------|------|-------------|-------------|-------------|----------|
| 1      | 185.456       | MM   | 1.7632      | 656.13544   | 6.20205     | 50.27559 |
| 2      | 191.506       | MM   | 1.6850      | 648.94202   | 6.41878     | 49.72441 |

### Enantioenriched 13 (optimized conditions: Table 4, entry 4).

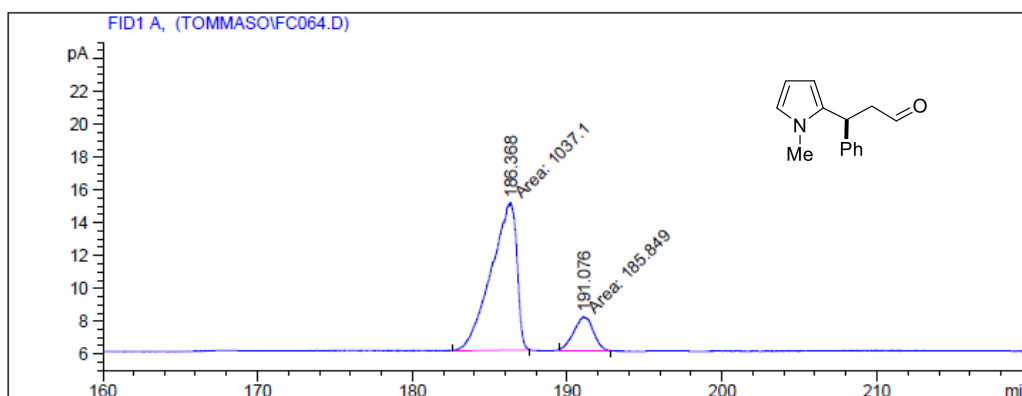

| Peak # | RetTime [min] | Type | Width [min] | Area [pA*s] | Height [pA] | Area %   |
|--------|---------------|------|-------------|-------------|-------------|----------|
| 1      | 186.368       | MM   | 1.9155      | 1037.09875  | 9.02356     | 84.80318 |
| 2      | 191.076       | MM   | 1.4762      | 185.84918   | 2.09825     | 15.19682 |

## Racemic 15a.

Sample Info : Hydrodex-B-TBDAC  
 130 °C  
 1.1 mL/min He  
 50:1 split  
 racemic from crotonaldehyde

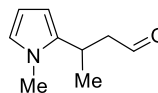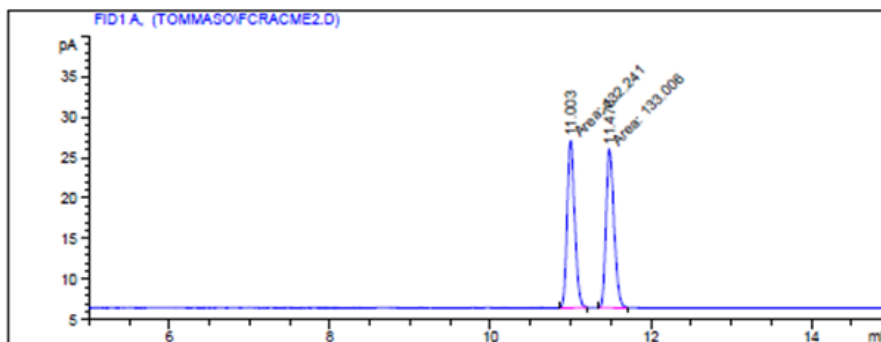

| Peak # | RetTime [min] | Type | Width [min] | Area [pA*s] | Height [pA] | Area %   |
|--------|---------------|------|-------------|-------------|-------------|----------|
| 1      | 11.004        | MM   | 0.1064      | 131.61288   | 20.62437    | 50.38513 |
| 2      | 11.475        | MM   | 0.1107      | 129.60085   | 19.50818    | 49.61487 |

## Enantioenriched 15a.

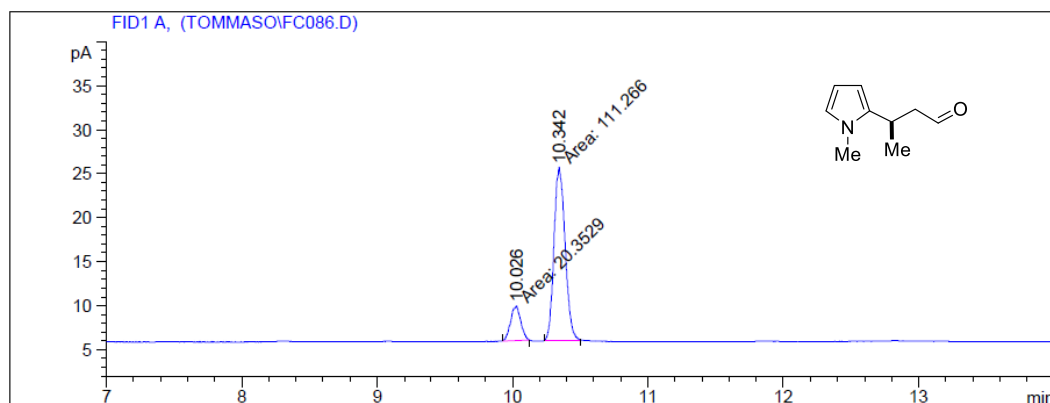

| Peak # | RetTime [min] | Type | Width [min] | Area [pA*s] | Height [pA] | Area %   |
|--------|---------------|------|-------------|-------------|-------------|----------|
| 1      | 10.026        | MM   | 0.0861      | 20.35293    | 3.93884     | 15.46349 |
| 2      | 10.342        | MM   | 0.0946      | 111.26637   | 19.60088    | 84.53651 |

## Racemic 15b.

Sample Info : Hydrodex-β-TBDAC  
 90 °C  
 1.1 mL/min He  
 50:1 split  
 racemic nPr

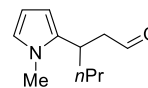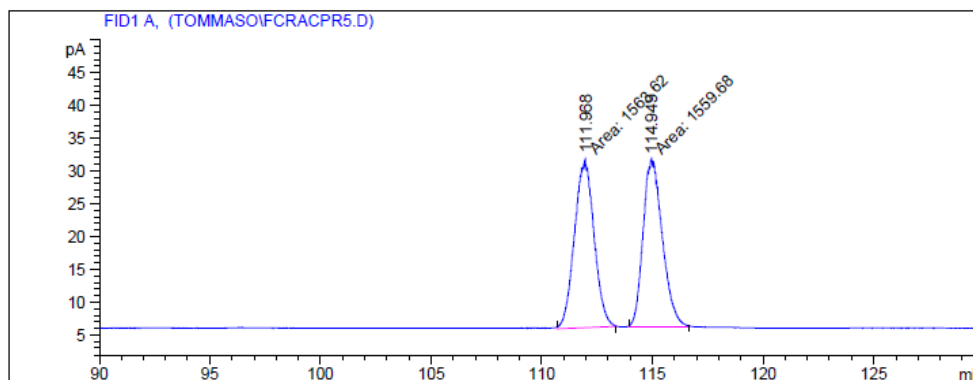

| Peak # | RetTime [min] | Type | Width [min] | Area [pA*s] | Height [pA] | Area %   |
|--------|---------------|------|-------------|-------------|-------------|----------|
| 1      | 111.968       | MM   | 1.0052      | 1563.62000  | 25.92435    | 50.06300 |
| 2      | 114.949       | MM   | 1.0048      | 1559.68433  | 25.86973    | 49.93700 |

## Enantioenriched 15b.

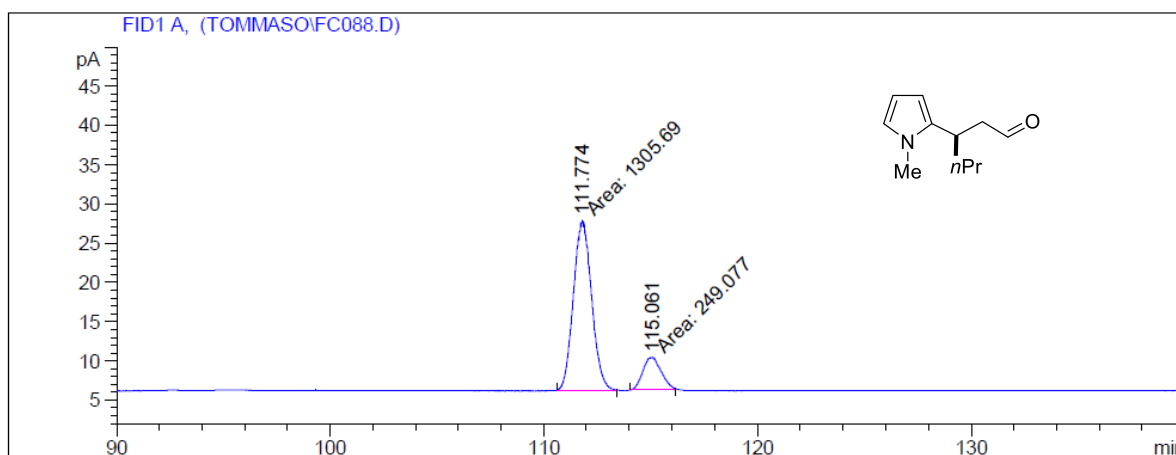

| Peak # | RetTime [min] | Type | Width [min] | Area [pA*s] | Height [pA] | Area %   |
|--------|---------------|------|-------------|-------------|-------------|----------|
| 1      | 111.774       | MM   | 0.9970      | 1305.69275  | 21.82700    | 83.97980 |
| 2      | 115.061       | MM   | 0.9835      | 249.07718   | 4.22106     | 16.02020 |



## Racemic 15c.

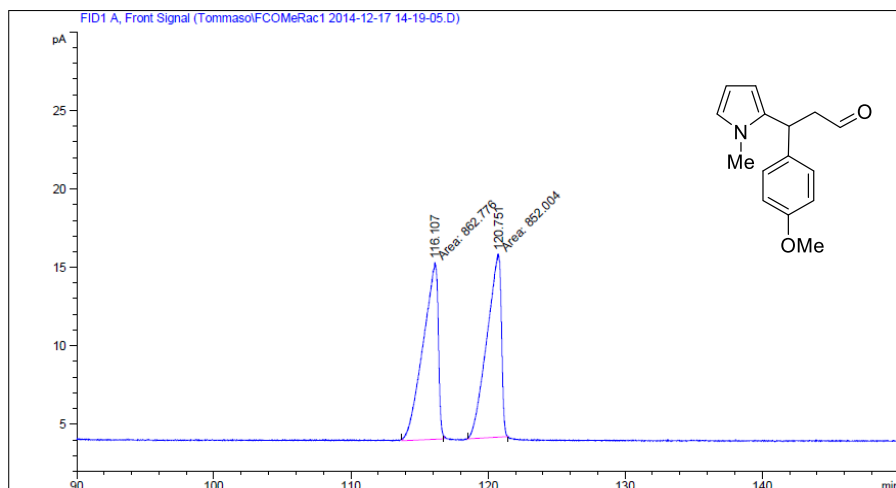

## Enantioenriched 15c.

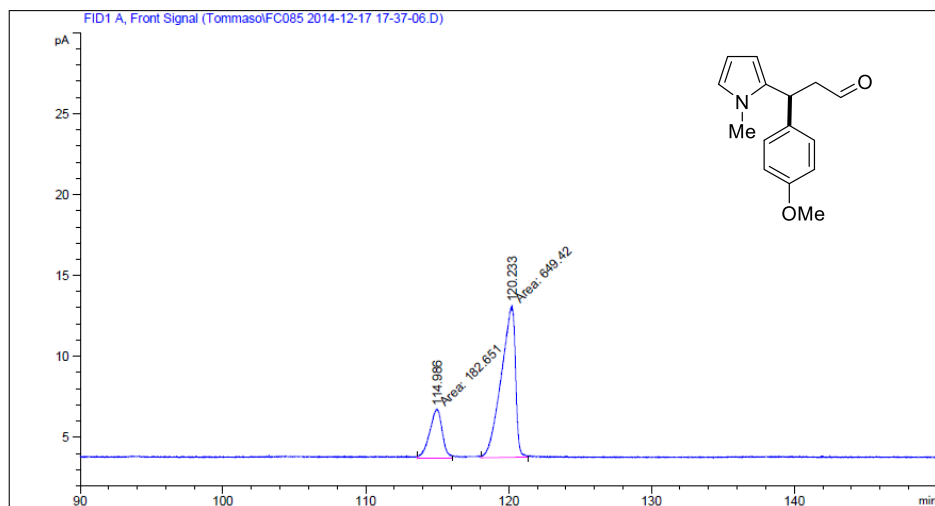

## Racemic 15d.

Sample Info : Hydrodex-B-TBDAC  
160 °C  
1.1 mL/min He  
50:1 split  
racemic

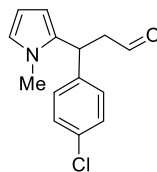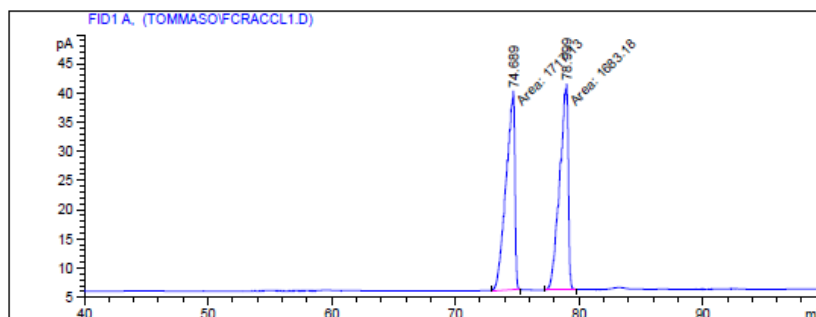

| Peak # | RetTime [min] | Type | Width [min] | Area [pA*s] | Height [pA] | Area %   |
|--------|---------------|------|-------------|-------------|-------------|----------|
| 1      | 74.689        | MM   | 0.8409      | 1714.01038  | 33.97167    | 50.14686 |
| 2      | 78.999        | MM   | 0.7999      | 1703.97095  | 35.50229    | 49.85314 |

## Enantioenriched 15d.

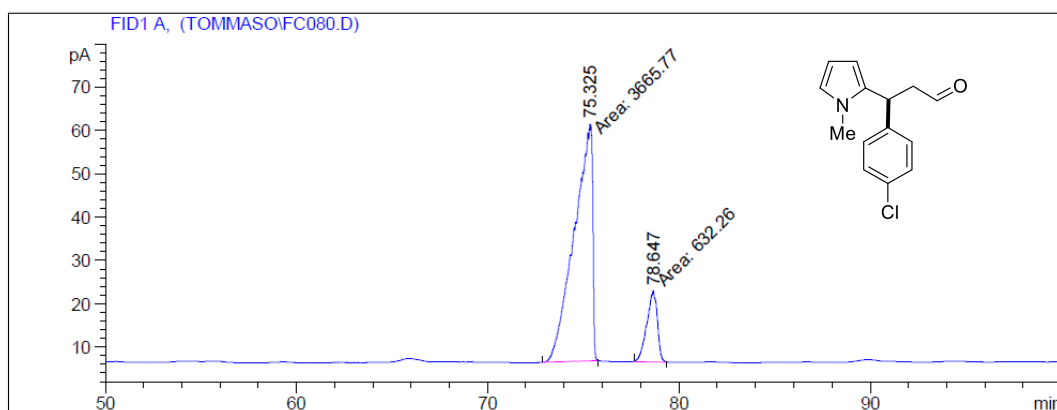

| Peak # | RetTime [min] | Type | Width [min] | Area [pA*s] | Height [pA] | Area %   |
|--------|---------------|------|-------------|-------------|-------------|----------|
| 1      | 75.325        | MM   | 1.1146      | 3665.77295  | 54.81347    | 85.28955 |
| 2      | 78.647        | MM   | 0.6337      | 632.25977   | 16.62761    | 14.71045 |

## Racemic 15e.

Sample Info : Hydrodex- $\beta$ -TBDAC  
 140 °C to 200 °C, 1 °C/min  
 1.1 mL/min He  
 50:1 split  
 racemic

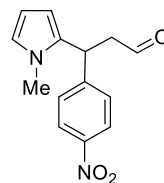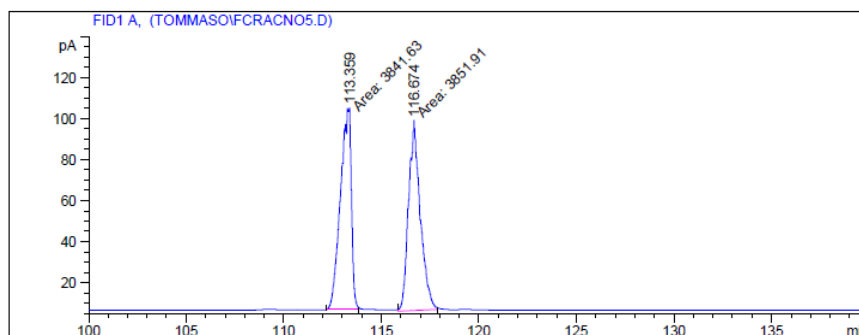

| Peak # | RetTime [min] | Type | Width [min] | Area [pA*s] | Height [pA] | Area %   |
|--------|---------------|------|-------------|-------------|-------------|----------|
| 1      | 113.359       | MM   | 0.6509      | 3841.62915  | 98.36903    | 49.93319 |
| 2      | 116.674       | MM   | 0.6930      | 3851.90869  | 92.63337    | 50.06681 |

## Enantioenriched 15e.

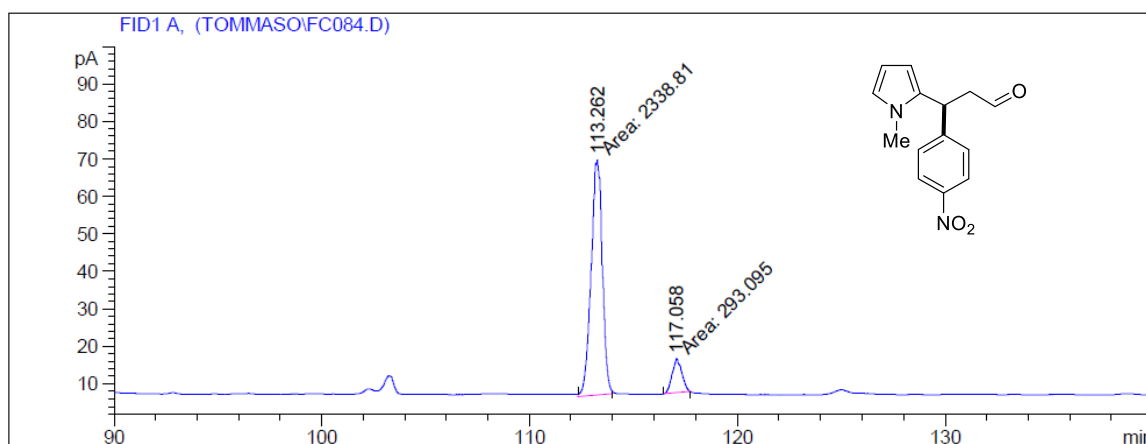

| Peak # | RetTime [min] | Type | Width [min] | Area [pA*s] | Height [pA] | Area %   |
|--------|---------------|------|-------------|-------------|-------------|----------|
| 1      | 0.165         | BV   | 0.1011      | 7.02994e-1  | 9.20222e-2  | 0.02670  |
| 2      | 113.262       | MM   | 0.6214      | 2338.81006  | 62.72633    | 88.84003 |
| 3      | 117.058       | MM   | 0.5343      | 293.09525   | 9.14316     | 11.13326 |

## 7. References

- 1) Zhang, Y.; Zhao, L.; Lee, S. S.; Ying, J. Y. *Adv. Synth. Catal.* **2006**, *348*, 2027–2032.  
doi: 10.1002/adsc.200600240
- 2) Sunder, A.; Mülhaupt, R.; Haag, R.; Frey, H. *Adv. Mater.* **2000**, *12*, 235–239.  
doi: 10.1002/(SICI)1521-4095(200002)12:3<235::AID-ADMA235>3.0.CO;2-Y
- 3) Roller, S.; Zhou, H; Haag, R. *Molec. Divers.* **2005**, *9*, 305–316.  
doi: 10.1007/s11030-005-8117-y
- 4) Paez, J. I.; Brunetti, V.; Strumia, M. C.; Becherer, T.; Solomun, T.; Miguel, J.; Hermanns, C. F.; Calderón, M.; Haag, R. *J. Mater. Chem.* **2012**, *22*, 19488–19497.  
doi: 10.1039/c2jm32486e
- 5) Rostovtsev, V. V.; Green, L. G.; Fokin, V. V.; K. B. Sharpless, *Angew. Chem. Int. Ed.* **2002**, *41*, 2596–2599.  
doi: 10.1002/1521-3773(20020715)41:14<2596::AID-ANIE2596>3.0.CO;2-4
- 6) Wyszogrodzka, M.; Haag, R. *Chem. Eur. J.* **2008**, *14*, 9202–9214.  
doi: 10.1002/chem.200800892
- 7) Ahrendt, K. A.; Borths, C. J.; MacMillan, D. W. C. *J. Am. Chem. Soc.* **2000**, *122*, 4243–4244.  
doi: 10.1021/ja000092s
- 8) Sonoda, Y.; Goto, M.; Tsuzuki, S.; Tamaoki, N. *J. Phys. Chem. A* **2006**, *110*, 13379–13387.  
doi: 10.1021/jp064937j
- 9) Paras, N. A.; MacMillan, D. W. C. *J. Am. Chem. Soc.* **2001**, *123*, 4370–4371.  
doi: 10.1021/ja015717g

10) Riente, P.; Yadav, J.; Pericàs, M. A. *Org. Lett.* **2012**, *14*, 3668–3671.

doi: 10.1021/ol301515d
